# Supplementary material
Source: ML conference proceedings conference paper supplement (https://openreview.net/forum?id=Sffus7SolE)
Supplement: supplementary_material [file attachment]

---

# Off-Beat Multi-Agent Reinforcement Learning

---

Anonymous Author(s)

Affiliation

Address

email

## Abstract

We investigate model-free multi-agent reinforcement learning (MARL) in environments where *off-beat* actions are prevalent, *i.e.*, all actions have pre-set execution durations. During execution durations, the environment changes are influenced by, but not synchronised with, action execution. Such a setting is ubiquitous in many real-world problems. However, most MARL methods assume actions are executed immediately after inference, which is often unrealistic and can lead to catastrophic failure for multi-agent coordination with off-beat actions. In order to fill this gap, we develop an algorithmic framework for MARL with off-beat actions. We then propose a novel episodic memory, LeGEM, for model-free MARL algorithms. LeGEM builds agents' episodic memories by utilizing agents' individual experiences. It boosts multi-agent learning by addressing the challenging temporal credit assignment problem raised by the off-beat actions via our novel reward redistribution scheme, alleviating the issue of non-Markovian reward. We evaluate LeGEM on various multi-agent scenarios with off-beat actions, including Stag-Hunter Game, Quarry Game, Afforestation Game, and StarCraft II micromanagement tasks. Empirical results show that LeGEM significantly boosts multi-agent coordination and achieves leading performance and improved sample efficiency.

## 1 Introduction

In Multi-Agent Reinforcement Learning (MARL), multiple agents act interactively and complete tasks in a sequential decision-making manner with Reinforcement Learning (RL). It has made remarkable advances in many domains, including autonomous systems [8, 19, 72] and real-time strategy (RTS) video games [58]. By the virtue of the *centralised training with decentralised execution* (CTDE) [33] paradigm, which aims to tackle the scalability and partial observability challenges in MARL, many CTDE-based MARL methods are proposed [13, 49, 41, 62, 47, 63, 23, 35]. With these methods, an agent executes actions only via feeding its individual observations independently and optimizes its own policy with access to global trajectories centrally.

Despite the recent successes of MARL, learning effective multi-agent coordination policies for complex multi-agent systems remains challenging. One key challenge is the *off-beat* actions, *i.e.*, all actions have pre-set execution durations<sup>1</sup> and during the execution durations, the environment changes are influenced by, but not synchronised with, action execution (an illustrative scenario is shown in Fig. 1). However, Dec-POMDP [32], which underpins many CTDE-based MARL methods, hinges on the assumption that actions are executed momentarily after inference, leading to catastrophic failure for *centralized training* on various off-beat multi-agent scenarios (OBMAS). To fill this gap, we study MARL in settings where off-beat actions are prevalent. Such setting is very common in many real-world problems. For example, in the traffic light control problem, traffic lights in the conjunctions of the road network have pre-set execution time which is set asynchronously.

---

<sup>1</sup>In the RL literature [39, 6], action execution durations are called *delays of actions*. In this paper, we use the term *execution durations*, which is self-consistent with off-beat actions defined in Sec. 3.

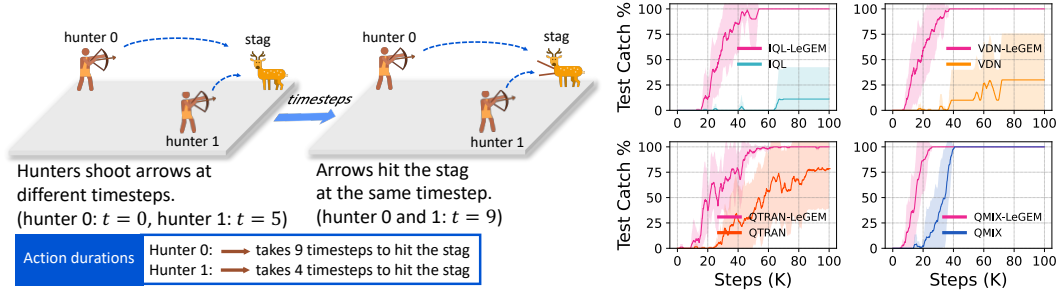

Figure 1: **An illustrative scenario:** two-agent stag-hunter game, where two agents (hunters) have only partial observations, different durations of the shoot action, and cannot communicate. The goal is to catch the stag and they are rewarded when their shot hits – as in, completion of the action is synchronised, the stag at the same time. Both agents can see the stag. As the shoot action durations of the two agents are different, to catch the stag, the two agents should shoot the arrow at different timesteps given the distances. Though the scenario is easy for human beings, it is hard for MARL agents due to the action duration. **Experiment results:** in this scenario, the optimal policy for agent 0 is to shoot the arrow at timestep 0 while the optimal policy for agent 1 is to shoot the arrow at timestep 5. Such asynchronous property of OBMA motivates agents to learn tacit policies. The curves show that VDN and IQL fail to learn coordination policies even in this simple scenario. With LeGEM, MARL methods gain enhanced performances as well as improved sample efficiency.

The problem of off-beat actions in MARL has yet to be investigated and tackled. Training MARL policies in OBMA is challenging: (i) Each agent’s actions can have a variety of execution durations, which augments the order of complexity of OBMA during decentralized execution, resulting in failure of the coordination; (ii) The action durations are unknown to agents during individual executions, and communication is constrained and not always feasible, making it non-trivial to model the environment; (iii) During training, both the temporal credit assignment with TD-learning [51] and the *inter-agent* credit assignment with value decomposition methods [41] cannot perform well due to the displaced rewards in multi-agent replay. With off-beat actions, the nonstationarity issue, which mainly stems from rewards’ time dependency on the agents’ past actions, is exacerbated.

While actions durations are ubiquitous, existing works only focus on single-agent settings, *i.e.*, delay, in RL. Many approaches [59, 39, 66] augment the state space with the queuing actions to be executed into the environment. However, such state-augmentation trick leads to exponentially increasing training samples with the growing action duration, making training intractable [11]. Chen et al. [10] extend the delayed MDP [39] and propose Delayed Markov Game for MARL. However, on one hand, such state-augmentation treatment is confined to short delays, *e.g.*, one timestep delay; on the other hand, the delayed timestep of the actions is privileged information, which is not available in many scenarios. Recent works on macro-actions [67, 68] introduce asynchronous actions by designing macro-actions with prior environment knowledge. Macro-actions are different from options in hierarchical RL (HRL) [52, 3] in that the later is not manually designed but learned. The key difference between macro-actions and off-beat actions is that macro-actions are high-level actions while off-beat actions are primitive actions. Unfortunately, the *inter-agent* credit assignment is still a challenge of HRL in OBMA and the asynchronous<sup>2</sup> nature of off-beat actions undermines the temporal credit assignment of *centralized training*, causing poor sample efficiency and unsatisfactory performance (more discussions can be found in the related works section in Sec. 7).

We aim to address the aforementioned issues. We first propose off-beat Dec-POMDP. We then instantiate a new class of episodic memory, LeGEM, for model-free MARL algorithms. LeGEM boosts multi-agent learning by addressing the challenging temporal credit assignment problem raised by the off-beat actions via our novel levelled graph-based temporal recency reward redistribution scheme. Specifically, each agent maintains LeGEM and during centralized training, each agent searches the pivot timestep given observations from its graph. The pivot timestep is the timestep wherein the off-beat reward relates to the given node. The pivot timesteps of each agent are ranked, in which the final pivot timestep will be chosen by recency and later used for reward redistribution and target estimation in TD-learning. We evaluate our method on Stag-Hunter Game, Quarry Game, Afforestation Game, and StarCraft II micromanagement tasks. Empirical results show that our method significantly boosts multi-agent coordination and achieves leading performance as well as improved sample efficiency.

<sup>2</sup>We clarify the term *asynchronous*: actions that simultaneously committed into the environment by all agents in MARL will not complete their respective action durations at the same time in future timesteps.

## 72 2 Preliminaries

73 **Dec-POMDP.** A cooperative MARL problem can be modeled as a *decentralised partially observable*  
 74 *Markov decision process* (Dec-POMDP) which can be formulated as a tuple  $\langle \mathcal{S}, \mathcal{U}, \mathcal{P}, R, O, \mathcal{N}, \gamma \rangle$ ,  
 75 where  $\mathbf{s} \in \mathcal{S}$  denotes the state of the environment. Each agent  $i \in \mathcal{N} := \{1, \dots, N\}$  chooses an  
 76 action  $u_i \in \mathcal{U}$  at each timestep, forming a joint action vector,  $\mathbf{u} := [u_i]_{i=1}^N \in \mathcal{U}^N$ . The Markovian  
 77 transition function can be defined as  $\mathcal{P}(\mathbf{s}' | \mathbf{s}, \mathbf{u}) : \mathcal{S} \times \mathcal{U}^N \times \mathcal{S} \mapsto [0, 1]$ , transiting one state of current  
 78 timestep to the state of next timestep conditioned on current state and joint action. Every agent shares  
 79 the reward and the reward function is  $R(\mathbf{s}, \mathbf{u}) : \mathcal{S} \times \mathcal{U}^N \mapsto \mathcal{R}$ .  $\gamma \in [0, 1)$  is the discount factor.  
 80 Due to *partial observability*, each agent has individual partial observation  $o \in \mathcal{O}$ , according to the  
 81 observation function  $O(\mathbf{s}, i) : \mathcal{S} \times \mathcal{N} \mapsto \mathcal{O}$ . The goal of each agent is to optimize its own policy  
 82  $\pi_i(u_i | \tau_i) : \mathcal{T} \times \mathcal{U} \mapsto [0, 1]$  given its action-observation-reward history  $\tau_i \in \mathcal{T} := (\mathcal{O} \times \mathcal{U})$ .

83 **Multi-Agent Reinforcement Learning.** MARL aims to learn optimal policies for all the agents  
 84 in the team. With TD-learning and a global Q value proxy  $Q^{\text{tot}}$  for the optimal  $Q^*$ ,  $\{Q_i\}_{i=1}^N$  are  
 85 optimized via minimizing the loss [65, 31]:  $\theta^* = \arg \min_{\theta} \mathcal{L}(\theta) := \mathbb{E}_{D' \sim \mathcal{D}} [(y_t^{\text{tot}} - Q_{\theta}^{\text{tot}}(\mathbf{s}_t, \mathbf{u}_t))^2]$ ,  
 86 where  $y_t^{\text{tot}} = r_t + \gamma \max_{\mathbf{u}'} Q_{\theta}^{\text{tot}}(\mathbf{s}_{t+1}, \mathbf{u}')$  and  $\theta$  is the parameters of the agents.  $\bar{\theta}$  is the parameter  
 87 of the target  $Q^{\text{tot}}$  and is periodically copied from  $\theta$ .  $D'$  is a sample from the replay buffer  $D$ .

## 88 3 Off-Beat Dec-POMDP

89 We introduce our formulation for OBMAS. We first define the off-beat actions<sup>3</sup> for multi-agent  
 90 scenarios; then we propose the Off-Beat Dec-POMDP. All the proofs can be found in Appx. A.

**Definition 1** (Off-Beat Actions). Off-beat action  $\tilde{u} \in \mathcal{U}$  characterizes OBMAS where the action  
 $\tilde{u}_i$  taken by agent  $i$  has execution duration  $m_{\tilde{u}_i} \sim A(m | \tilde{u}_i, i)$ ,  $A \in \mathcal{A}$ ,  $m \in \{0, 1, 2, \dots, M\}$   
 and  $M \leq T$ , where  $T$  is the maximum duration and  $A$  is the action duration distribution. It is a  
 distribution and takes  $\tilde{u}_i$  and the index of the agent as parameters.  $A$  can be either stochastic or  
 deterministic. The joint off-beat action is  $\tilde{\mathbf{u}} = [\tilde{u}_i]_{i=1}^N$ . The execution duration is decided at the time  
 the action was committed to the environment. Thus, the execution duration of an action  $\tilde{u}_t$  initiated  
 at timestep  $t$  is  $\mathbf{m}_t = \{m_{\tilde{u}_t}^t\}_{i=1}^N$ .

91  
 92 Note that for each agent,  $m_{\tilde{u}_t}^t$ <sup>4</sup> can be different. At timestep  $t$ , there are at least 1 action<sup>5</sup> and at most  
 93  $N$  actions being initiated (committed to the environment for execution), leading to asynchronicity of  
 94 the joint actions. Next, we propose the Off-Beat Dec-POMDP for OBMAS and discuss its properties.

**Definition 2** (Off-Beat Dec-POMDP). Off-Beat Dec-POMDP extends Dec-POMDP, such that  
 (1) state space is  $\mathcal{S}$ ; (2) joint action space is  $\mathcal{U}^N$ ; (3) action duration space is  $\mathcal{A}^N$ ;  
 (4) transition function is  $\mathcal{P}(\mathbf{s}' | \mathbf{s}, \tilde{\mathbf{u}}, \mathbf{m}) : \mathcal{S} \times \mathcal{U}^N \times \mathcal{S} \times \mathcal{A}^N \mapsto [0, 1]$ , and  $\mathbf{m}$  is the action durations  
 of the joint action;  
 (5) the reward function is  $R(\mathbf{s}, \tilde{\mathbf{u}}, \mathbf{m}) : \mathcal{S} \times \mathcal{U}^N \times \mathcal{A}^N \mapsto \mathcal{R}$ ;  
 (6) we call a reward  $r$  as off-beat reward when any its  $m_{\tilde{u}_i} \geq 1$ ,  $m_{\tilde{u}_i} \in \mathbf{m}$ , and  $r \neq 0$ .

95  
 96 In OBMAS, at each timestep  $t$ , the environment receives actions that agent initiates for execution  
 97 in the environment. The initiated actions  $\tilde{\mathbf{u}}_t$  are instantaneous actions inferred by agents' policies  
 98 given individuals' observations. The joint reward is the consequence of the committed joint actions  
 99 of current timestep and previous timesteps, depending on the actions' duration. The asynchronicity  
 100 is an inherent feature of the environment, which is different from asynchronicity incurred by com-  
 101 munication delays in many video games (asynchronous gameplay<sup>6</sup>). We discuss some properties of  
 102 Off-Beat Dec-POMDP below.

<sup>3</sup>Asynchronicity is prevalent in real-world multi-agent scenarios, including asynchronicity in observations,  
 actions and communication, etc. In this paper, we focus on the asynchronicity of actions in multi-agent scenarios.  
 For brevity, we name the asynchronicity of actions in MARL as *off-beat*.

<sup>4</sup>We will omit  $t$  in the rest of the paper for brevity.

<sup>5</sup>We note that agents have a special NO-OP action available.

<sup>6</sup><https://www.whatgamesare.com/2011/08/synchronous-or-asynchronous-definitions.html>

**Remark 1.** When the durations for all actions are identical, off-beat Dec-POMDP reduces to Delayed Dec-POMDP and there is no off-beat actions in it.

**Remark 2.** There exists  $\tilde{\mathbf{u}}$  that is synchronous since duration of agents' actions can be  $m = 0$ . When  $m$  of all actions is zero, off-beat Dec-POMDP reduces to Dec-POMDP.

In Delayed Dec-POMDP, actions have the same delayed timesteps, which is different from off-beat actions where actions have different action durations or delays. In order to investigate the problem, we consider the deterministic setting of the transition function and the reward function.

**Remark 3** (Non-episodic Reward). In our formulation, the reward is not episodic reward [16].

**Remark 4** (Non-Markovian Reward). With off-beat actions, the Markovian property of the reward function  $R(s, \tilde{\mathbf{u}}, \mathbf{m})$  does not hold.

With off-beat actions, the shared rewards can be readily displaced, causing non-Markovian rewards. Solving Off-Beat Dec-POMDP is challenging as discussed in Sec. 1. We propose our methods to tackle aforementioned challenges.

## 4 The Journey is the Reward: A Collective Mental Time Travel Method

We propose two methodological elements for Off-Beat MARL. The first, LeGEM, presented in this section, is a form of episodic memory that facilitates discovery of a pivotal timestep for off-beat rewards; and the second, presented in Sec. 5, is redistribution of the off-beat reward to the pivot timestep when the relevant off-beat actions were initialised.

### 4.1 LeGEM: A Levelled Graph Episodic Memory for Off-Beat MARL

Human learning relies on retrospecting our detailed memory of the past [55, 48]. For example, while exploring a new scenic area, we do not just remember a multitude of specific spots there, but can recall the paths that connect them with junctions and turns. However, there is no MARL method that can explicitly recall the past and identify key states that lead to future rewards. Such "mental time travel" [24] ability is vital for tackling the challenges in OBMA. Inspired by the recent progress in RL with episodic memory [18, 5, 17] that is based on the memory prosthesis proposed by neuroscientists [55, 48], we propose our method of episodic memory representation for MARL. Unlike previous episodic memory methods that train a parameterized memory by either augmenting the policy inputs for execution [18] or regularizing the TD learning [17] for RL, our method utilizes the levelled graph data structure [4], a well established structure for data storage and retrieval, to represent an agent's individual episodic memory.

We propose our novel episodic memory, Levelled Graph Episodic Memory method (LeGEM), via the levelled graph data structure. LeGEM memorizes each agent's past trajectories which are partial observations and the unilateral action of the agent. During training, each agent  $i$  collects its individual trajectories  $\tau_i$ . We then define  $\tau_i$  of agent  $i$  as  $\tau_i = [(o_i^0, \tilde{u}_i^0, r^0), \dots, (o_i^{T-1}, \tilde{u}_i^{T-1}, r^{T-1})]$ , where  $T$  is the length of the trajectory and the triplet  $(o_i^t, \tilde{u}_i^t, r^t)$  represents the observation, action and reward of timestep  $t$ . Note that  $r^t$  is globally shared between agents. We define agent  $i$ 's LeGEM as a directed graph  $\phi_i^t \in \Phi_i$  where  $\Phi_i$  is the set of graphs of agent  $i$  and  $\phi_i^t$  is the  $t$ -th graph of  $\Phi_i$ ,  $t \in \{0, \dots, T-1\}$ . Each  $\phi_i^t$  consists of a tuple of  $(\Psi, \Xi)$  where  $\Psi$  is the set of nodes and  $\Xi$  represents the set of edges that connect nodes in the graph. To model an agent's behaviour explicitly and make the trajectories of agents easy to represent, we create  $T$  graphs for each agent and let  $\Phi_i = \{\phi_i^t\}_{t=0}^{T-1}$  where  $T$  is the maximum level of all graphs and the maximum length of the episode as well. The maximum level of  $\phi_i^t$  is  $t + 1$ . The node contains key, visit count and pointers connecting the precursors (node at the previous level) and the successors (node at the next level). Unlike many parameterized episodic memory using state/observation as the key [18, 24], we resort to *afterstate* [36]. That is, we use agent  $i$ 's observation  $o_i^t$  and action at timestep  $t$ ,  $\tilde{u}_i^t$ , to define the key  $(o_i^t, \tilde{u}_i^t)$ . We provide an example to showcase the relationship between sub-graph and the graph in Fig. 2. For complex and continuous state scenarios, for example StarCraft II scenarios, we

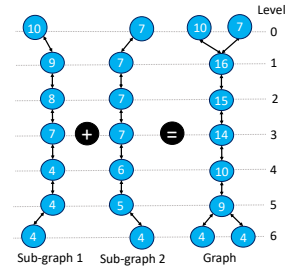

Figure 2: The maximum level of the graph is 7. Circles indicate the nodes and numbers indicate the visit count.



**Algorithm 1: SearchPivotTimesteps ( $\rho$ )**


---

```

1 Input:  $\tau, \Phi, \Upsilon$  and Search (scheme I or II);
2 Initialize:  $\kappa$ : an empty list to store pivot timesteps;
  // Length of  $\tau$  and  $\tau_i$  are equal.
3  $l \leftarrow \text{length}(\tau_i) - 1$ ;
4 for  $t \leftarrow 0$  to  $\text{length}(\tau) - 1$  do
5   if  $r^t \neq 0$  ( $r^t \in \tau$ ) then
6     // Off-beat reward
7     for  $i \leftarrow 1$  to  $N$  do
8       Get  $\tau_i$  from  $\tau$ ;
9        $\phi_i^l \leftarrow \Phi_i[l]$ ;
10       $\psi \leftarrow \phi_i^l.\text{getNode}(o_i^t, \tilde{u}_i^t)$ ;
11      Find all the paths  $\Lambda_i^{t,l}$  from node  $\psi$  to
        the node at level 0;
12      Get the discretized episode return  $r^{l,i}$ ;
13      Get the index  $\omega$  from  $\Upsilon$  with  $r^{l,i}$ ;
14       $e_i^t \leftarrow \text{Search}(\omega, \Lambda_i^{t,l}, \tau_i, r^{l,i}, \Upsilon, \Phi_i)$ ;
15      Get  $e_t$  (Eqn. 1) and append  $e_t$  to  $\kappa$ ;
16 Return:  $\kappa$ .

```

---

**Algorithm 2: Search Scheme I**


---

```

1 Input:  $\omega, \Lambda_i^{t,l}, \tau_i, r^{l,i}, \Upsilon$  and  $\Phi_i$ ;
2 Initialize:  $e_t^i$ : a list whose values are all  $t$ 
  and its size is the number of paths in  $\Lambda_i^{t,l}$ ;
3  $\phi_i^{l,\omega} \leftarrow \Phi_i^{l,\Omega}[\omega]$ ;
4  $\text{vc} \leftarrow \text{VisitCount}(\Lambda_i^{t,l})$  (Alg. 4);
5 foreach path  $\Lambda_i^{t,l}[j] \in \Lambda_i^{t,l}$  do
6    $e_t^{i,j,\downarrow} \leftarrow \text{UL}(\Lambda_i^{t,l}[j], \text{vc}, \tau_i)$  (Alg. 5);
7    $e_t^{i,j,\uparrow} \leftarrow \text{LU}(\Lambda_i^{t,l}[j], \text{vc}, \tau_i)$  (Alg. 6);
8   if  $e_t^{i,j,\downarrow} \neq -1$  then
9      $e_t^i[j] \leftarrow e_t^{i,j,\downarrow}$ ;
10  else if  $e_t^{i,j,\uparrow} \neq -1$  then
11     $e_t^i[j] \leftarrow e_t^{i,j,\uparrow}$ ;
12  else
13     $e_t^i[j] \leftarrow t$ ;
14  $e_t^i \leftarrow \text{Summarize}(e_t^i)$  (Alg. 7);
15 Return:  $e_t^i$ .

```

---

154 use SimHash [9] to discretize the key  $(o_i^t, \tilde{u}_i^t)$ . This technique has been widely used in commercial  
 155 search engines and RL [54]. Visit count indicates the total visits made by agent  $i$  to the node. It initial  
 156 value is 1. Note that nodes are bidirectional since it is helpful for searching (see Sec. 4.2).

157 Given a  $\tau_i$  with the length of  $T$ , if the node is already in the graph at level  $t$ , we then increase the  
 158 visit count by 1. Otherwise, we create a new node for level  $t$  of the graph and update its pointers.  
 159 Meanwhile, sub-graphs will be also created and updated. The process of updating LeGEM is in Alg.  
 160 3. We provide an example of Alg. 3 in Fig. 9, Appx. B.1. It is worth noting that  $\tau_i$  is generated via  
 161 the interaction of the agent with the environment, and there is no extra interaction needed to collect  $\tau_i$ .  
 162 The generated trajectories are saved in the experience replay and later sampled for MARL training.

## 163 4.2 Multi-Agent Collective Mental Time Travel with LeGEM

164 With structured agent's past experiences, it can be used to search the pivot timestep when actions  
 165 that triggered the rewarded state were executed. For example, with LeGEM, we can find the pivot  
 166 timestep,  $e_t = 5$ , when agent 1 shoots the arrow in Fig. 1.

167 **Fact 1.** (Action-Reward Association) *When an off-beat reward  $r_t$  exists in the trajectory  $\tau_i$  ( $i \in$   
 168  $\{1, \dots, N\}$ ),  $r_t \in \tau_i$ , off-beat action  $u_{t'}$  exists ( $t' < t$ ) in the trajectory set  $\{\tau_j\}_{j=1}^N$ , where  $\{\tau_j\}_{j=1}^N$   
 169 constitutes the global trajectory of all agents.*

170 As the reward function and transition function are deterministic in our setting, Fact 1 holds. Intuitively,  
 171 once we find an off-beat reward in a trajectory, we are sure that the action which triggered the reward  
 172 can be found in the trajectory. With more experiences collected by the agents, such pattern is obvious  
 173 and significant. It motivates us to propose a method to leverage the association property of the  
 174 off-beat action-reward data and search the pivot timestep for timesteps when off-beat rewards occur,  
 175 which can further help to redistribute the reward backward to mitigate the temporal credit assignment  
 176 issue (c.f. Sec. 5). Therefore, we first propose a search method to search the pivot timestep and then  
 177 propose a proximal ranking method to estimate the pivot timestep that invokes the future reward.

178 **Collective Mental Time Travel.** The displaced rewards in the replay buffer hinder multi-agent  
 179 learning. It is essential for each agent to search the pivot timestep when the potential off-beat action  
 180 that triggered the rewarded state was committed to the environment. Therefore, we propose two  
 181 search schemes to find the pivot timestep for all agents given an off-beat reward.

182 *Scheme I:* For agent  $i$ , given  $r_t \in \tau_i$ , episode return  $r^{l,i}$  of  $\tau_i$ ,  $\phi_i^l = \Phi_i[l]$  and  $\phi_i^{l,\omega} = \Phi_i^{l,\Omega}[\omega]$ ,  
 183 agent  $i$  searches from the node (the key is  $(o_i^t, \tilde{u}_i^t)$  and  $o_i^t \in \tau_i, u_i^t \in \tau_i$ ) at level  $t$  in sub-graph  $\phi_i^{l,\omega}$  to  
 184 find the pivot timestep  $e_t$  for  $r_t$ . Concretely, we propose our bi-directional search method. The first  
 185 one is called Low-Up (LU) search, which traverses from the given node at level  $t$  upwards to the node  
 186 at level 0. The second one is named Up-Low (UL) search which traverses from the node at level 0  
 187 downwards to the given node at level  $t$ . LU traversing ends when the pattern of increasing visit count

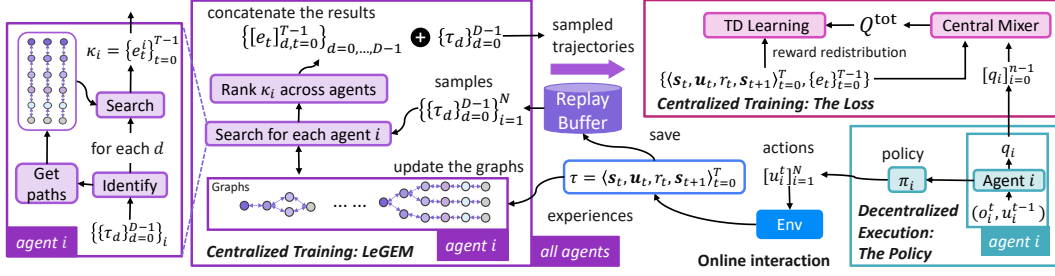

Figure 3: Our framework: LeGEM, the loss and the agent's policy.

ends and the corresponding level is the candidate pivot timestep. On the contrary, UL traversing ends when the pattern of decreasing visit count ends and the corresponding level is the candidate pivot timestep. In Alg. 2, we first get visit count (Line 4) and then apply UL traversing (Line 6) and LU traversing (Line 7). We summarize the results (Line 14) by select the pivot timestep that has the maximum count. UL traversing has a higher searching priority than its counterpart. The reason is that there exists pattern that the visit count is decreasing from the node at level 0 and such pattern ends at the pivot timestep. In practise, it works well in scenarios whose trajectories are single-off-beat-reward trajectories (there is only one off-beat reward) and the accuracy of Scheme I is over 90% in grid world scenarios. For scenarios, especially complex scenarios, whose trajectories are multiple-off-beat-reward trajectories, we apply Scheme II. We put Alg. 4, Alg. 5, Alg. 6 and Alg. 7 in Appx. B.1 as these algorithms are intuitive and easy to understand literally. The time complexity is  $\mathcal{O}(n \cdot m)$  (a slight notation abuse) where  $n$  is the size of each  $\Lambda_i^{t,l}$  and  $m$  ( $1 \leq m \leq n$ ) is the average distance between the level of the given node to the level of the node at the pivot timestep.

**Scheme II:** Scheme II is a simplified version of scheme I for scenarios that have multiple-off-beat-reward trajectories, which searches the pivot timestep by finding the nearest timestep in the most visited path. The node of the nearest timestep has the maximum visitcount in that path. Despite the simplicity, it works effective and the time complexity is  $\mathcal{O}(n)$  where  $n$  is the number of paths in  $\Lambda_i^{t,l}$ . The pseudo code is shown in Alg. 8 in Appx. B.1.

Given a node at level  $t$ , agents collectively search from the node to find the pivot time step (Line 13 in Alg. 1). The visit count is vital for search methods. In MARL, we use  $\epsilon$ -greedy [31] for agents to explore the environment and collect individual trajectories. The collected trajectories will be used to build the memory and train the policy. We apply annealing to  $\epsilon$  (in Appx. E).

**Ranking the Pivot Timesteps.** With our two search schemes, we can search the pivot timesteps for each global trajectory  $\tau = \{(s^t, \tilde{u}^t, r^t, s^{t+1})\}_{t=0}^{T-1}$ . We define the pivot timesteps  $\kappa$  of each global trajectory  $\tau$  as  $\kappa = \{e_t\}_{t=0}^{T-1}$ ,  $0 \leq e_t \leq t$ , where  $e_t$  indicates the pivot timestep of  $t$  when  $r_t$  is the consequence of actions committed before timestep  $t$ . We first get  $e_t$  by aggregating all the searching outcomes (Line 13 in Alg. 1). Then, each agent gets  $\kappa_i = \{e_t^i\}_{t=0}^{T-1}$ . In order to subserve the inter-agent credit assignment [13, 41],  $\kappa$  can be collectively calculated via proximity:

$$e_t = \min_{e_t^i} \left[ t - e_t^1, \dots, t - e_t^N \right], i \in \{1, \dots, N\} \quad (1)$$

The pseudo code is shown in Alg. 1. For each sampled global trajectory  $\tau$ , we extract  $\tau_i$  for each agent in Line 7; then we get  $e_t$  for each agent and aggregate  $\kappa$  in line 14 and line 15, respectively.

## 5 Reward Redistribution for Off-Beat Multi-Agent Reinforcement Learning

Searching in LeGEM leverages the collective intelligence [25, 15] in OBMA. We utilize TD learning to train MARL policies. The TD error is the difference between the TD target and the prediction. TD targets can be estimated with  $n$ -step target, TD( $\lambda$ ) and other techniques [12, 56]. Unfortunately, current  $n$ -step target and TD( $\lambda$ ) methods are far from accurate estimating TD targets. They even incur underestimation with off-beat trajectories. In essence, to train MARL policies in OBMA, one should accurately estimate the TD target where the reward plays the key role [46, 70]. We resolve the aforementioned conundrum by redistributing rewards to their pivot timesteps. The key idea is that we can pull the outcome of one joint off-beat action back to the timestep when it was committed to the environment, which can dramatically enhance learning despite the long-term reward delays incurred by off-beat actions. We utilize  $e_t$  to update the reward of the transit  $(s^{e_t}, \tilde{u}^{e_t}, r^{e_t}, s^{e_t+1})$ :

$$\hat{r}^{e_t} = \mathbb{1}(e_t \geq t) \cdot r^{e_t} + \mathbb{1}(e_t < t) \cdot r_t, \quad (2)$$

where  $\mathbb{1}(\cdot)$  is the indicator function. Such update rule is conducted iteratively from  $t = 0$  to  $t = T - 1$ .  $\beta$  is a very small positive hyperparameter. To stabilize learning and circumvent the overestimation of the TD target,  $r_t$  is also updated after Eqn. 2 via  $r_t = (1 - \mathbb{1}(e_t < t) \cdot (1 - \beta)) \cdot r_t$ . It also avoids aggregated biased/wrong estimation of TD target being back propagated in Bellman Equation. Formally, we define the reward redistribution operator as  $\Pi_\Phi$ , i.e.,  $e_t = \Pi_\Phi \rho(r^t, s, \tilde{u})$ , and then define the Off-Beat Bellman operator  $\Gamma$ :

$$(\Gamma Q^{\text{tot}})(s, \tilde{u}) := \mathbb{E}[\Pi_\Phi R(s, \tilde{u}, m) + \gamma \max_{\tilde{u}'} Q^{\text{tot}}(s', \tilde{u}')] \quad (3)$$

With the Off-Beat Bellman operator  $\Gamma$ , we propose its contraction property.

**Proposition 1.**  $\Gamma : \mathcal{Q} \mapsto \mathcal{Q}$  is a  $\gamma$ -contraction.

Therefore, we can utilize  $\hat{r}_{e_t}$  for *centralized training* in TD-learning:

$$\mathcal{L}^{\text{TD}}(\theta) := \mathbb{E}_{\mathcal{D}' \sim \mathcal{D}}[(\hat{y}_{e_t}^{\text{tot}} - Q_\theta^{\text{tot}}(s^{e_t}, \tilde{u}^{e_t}))^2], \text{ where } \hat{y}_{e_t}^{\text{tot}} = \hat{r}_{e_t} + \gamma \max_{\tilde{u}'} Q_\theta^{\text{tot}}(s^{e_t+1}, \tilde{u}'). \quad (4)$$

Our method can be easily incorporated into any model-free MARL method for OBMA. We present the pseudo code of incorporating our method into model-free MARL methods in Alg. 9, Appx. E. We also provide a pictorial view of our framework in Fig. 3 to show the whole pipeline.

## 6 Experiments

We perform experiments on various multi-agent scenarios with off-beat actions. We introduce off-beat actions in Stag-Hunter Game, Quarry Game, Afforestation Game and StarCraft II micromanagement tasks [44] and use them as testbeds in our experiments. We aim to answer the following questions: **Q1:** Can our LeGEM improve the multi-agent coordination of many MARL methods in OBMA? **Q2:** Can our LeGEM outperform previous parameterized episodic memory (EM) for MARL? **Q3:** Can bootstrapping method of RL help? **Q4:** Can our LeGEM outperform the multi-agent exploration and multi-agent risk-sensitive (Ex-Risk) methods?

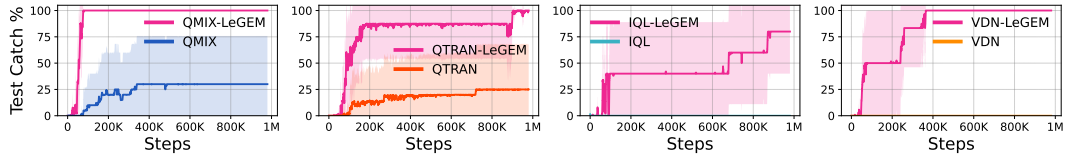

Figure 4: The test catch rate of the stag on the Stag-Hunter Game with off-beat actions.

### 6.1 Experiment Setup

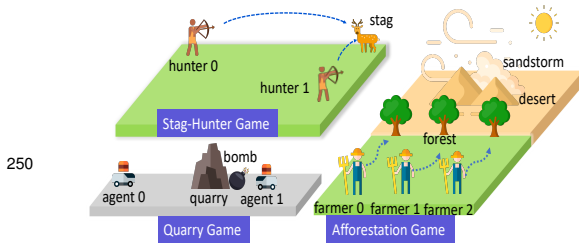

Figure 5: Stag-Hunter Game, Quarry Game and Afforestation Game. More information can be found in Appx. C.

| Categories     | Methods                                                   |
|----------------|-----------------------------------------------------------|
| MARL (Q1)      | QMIX [41], VDN [49]<br>IQL [53], QTRAN [47]<br>QPLEX [60] |
| EM (Q2)        | EMC [71]                                                  |
| Bootstrap (Q3) | N-step & $\lambda$ -Return [51]                           |
| Ex-Risk (Q4)   | MAVEN [28], EMC [71]<br>RMIX [38]                         |

Table 1: Baseline algorithms.

**Baselines and scenarios.** We list all baselines in table 1, including the corresponding research questions to be answered. We implement our method on PyMARL [44] and use 10 random seeds to train each method on all environments. We do not use macro-action methods [67, 68] as the baseline because it is hard to make a fair comparison between macro-actions methods and our method. As discussed in Sec. 1, macro-actions rely on manually designed macro-actions, i.e., designing the macro-actions by utilizing the simulator settings and domain knowledge, which is different from learning options [52, 3]. Designing macro-actions is not feasible in scenarios where domain knowledge and simulator settings are unknown, such as the OBMA scenarios. In OBMA, the agent has no idea of the durations of other agents' actions, which is challenging for designing macro-actions. We conduct experiments on Stag-Hunter Game, Quarry Game, Afforestation Game (Fig. 5) and StarCraft II micromanagement tasks [44] where off-beat action are introduced.

**Training settings.** We use opensourced code of baselines publicly by the corresponding authors on Github in all experiments. We resort to mean-std values as our performance evaluation measurement in all figures where the bold line and the shaded area indicate the mean value and one standard deviation of the episode return, respectively. Readers can refer to Appx. C, D, E and F for more information on our environment, baselines, training method, training platform and empirical results.

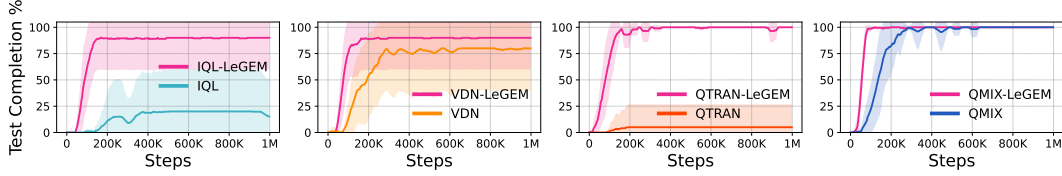

Figure 6: The test task completion rate of the Quarry Game with off-beat actions.

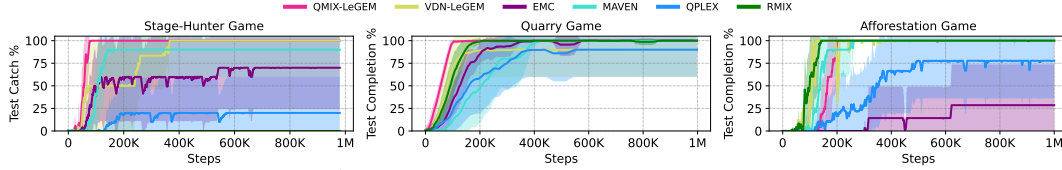

Figure 7: Performance of MARL methods

## 6.2 Experiment Results

**The Effectiveness of LeGEM.** We answer **Q1**. With LeGEM, MARL methods get enhanced performance as shown in Fig. 4. Without LeGEM, all methods perform poorly in Stag-Hunter Game; IQL and VDN’s final final results are even 0. By incorporating LeGEM, all of them can get converged performance and improved sample efficiency. We are also interested in finding if LeGEM could reinforce the performance of simple methods. As depicted in Fig. 7, with LeGEM, both VDN and QMIX outperforms QPLEX, which is a state-of-the-art MARL method armed with various advanced techniques, including attention network [57], dueling network [64] and advantage function.

**Performance of Episodic Memory method.** We answer **Q2** by presenting the performance curves of EMC in Fig. 7. EMC is an episodic memory MARL method with curiosity-driven exploration. It utilizes the episodic memory from RL [74, 17]. With LeGEM, QMIX outperforms EMC. EMC even fails to converge in Stag-Hunter Game.

Table 2: Results (mean and std) of  $n$ -step return (left) and TD( $\lambda$ ) (right) on Stag-Hunter Game.

| $n$  | 1              | 5         | 10        | 15        | $\lambda$ | 0.8          | 0.9          | 0.99         | 1            |
|------|----------------|-----------|-----------|-----------|-----------|--------------|--------------|--------------|--------------|
| QMIX | 60.0 $\pm$ 40% | 0 $\pm$ 0 | 0 $\pm$ 0 | 0 $\pm$ 0 | QMIX      | 100 $\pm$ 0% | 100 $\pm$ 0% | 89 $\pm$ 10% | 61 $\pm$ 37% |
| VDN  | 0 $\pm$ 0      | 0 $\pm$ 0 | 0 $\pm$ 0 | 0 $\pm$ 0 | VDN       | 0 $\pm$ 0    | 0 $\pm$ 0    | 0 $\pm$ 0    | 0 $\pm$ 0    |

**Performance of  $n$ -step return and TD( $\lambda$ ) methods.** To answer **Q3**, we use  $n$ -step return and TD( $\lambda$ ) to estimate the TD-target. As shown in Table. 2, with  $n$ -step return, both QMIX and VDN fail to learn good policies even with  $n = 15$ . Surprisingly, with TD( $\lambda$ ), QMIX can achieve good performance with  $\lambda \in \{0.8, 0.9, 0.99, 1\}$ . However, we cannot find such outcome on VDN and there is no guarantee of good results on using TD( $\lambda$ ).

### Performance of Multi-Agent Exploration and Risk-Sensitive MARL methods.

We also provide results of exploration methods for MARL and risk-sensitive MARL method to answer **Q4**. MAVEN utilizes mutual information to learn latent space for exploration and RMIX aims to learning risk-sensitive policies for MARL. In Fig. 7, RMIX even fails to learn. Mainly because the potential loss of reward is displaced by off-beat actions. Overall, MAVEN is stabler than EMC and RMIX. QMIX-LeGEM is stable in all scenarios and outperforms MAVEN. With LeGEM, even simple method such VDN can perform well and outperforms many MARL methods with complex and advanced components. Indeed, exploration in OBMA is beneficial for multi-agent learning. However, the key challenge of temporal credit assignment can not be easily addressed merely with exploration.

**SMAC.** We also conduct experiments on SMAC [44]. We train MARL methods and our method on 2m\_vs\_1z where are two agents combating with one opponent. To overcome the issue of

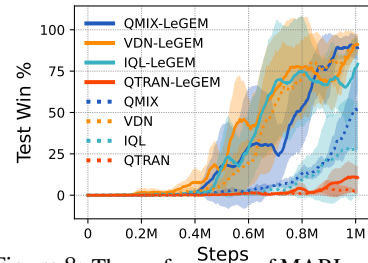

Figure 8: The performance of MARL methods on 2m\_vs\_1z.

high dimension continuous state space, We utilize simhash [9] to calculate the hash value of the key. We only select the attack action and set the action duration with 9. As illustrated in Fig. 8, incorporated with our novel episodic memory, QMIX, IQL and VDN illustrate enhanced performance, demonstrating the superiority of our method on complex multi-agent scenarios.

## 7 Related Works

**Action Delay in RL.** Conventionally, the execution of actions in RL is instantaneous and the execution duration is neglected. Katsikopoulos et al. [20] propose the Delayed MDP where actions have delays and Walsh et al [59] propose a model-based method for the Delayed MDP. To optimize the delayed MDP, many RL approaches [59, 39, 66, 69] augment the state space with the queuing actions to be executed into the environment. However, this state-augmentation trick is intractable [11]. Chen et al. [10] extend the delayed MDP [39] and propose a Delayed Markov Game. However, the state-augmentation treatment is confined to short delays and neglects the off-beat actions in multi-agent scenarios. Recently, Bouteiller et al. [6] apply replay buffer correction method. However, the delayed timestep is privileged information. It is not available for agents in many scenarios. Simply applying this single-agent trajectory correction in MARL cannot attain satisfactory performance due to off-beat actions; devising inter-agent trajectory correction methods for OBMA is non-trivial.

**Credit Assignment in RL.** Credit assignment [50, 52] tackles long-horizon sequential decision-making problem by distributing the contribution of each single step over the temporal interval. TD learning [51] is the most established credit assignment method, which is the basis of many RL methods. RUDDER [2] redistributes the episodic return to key timesteps in the episode [14, 42, 40]. Klissarov et al. [22] propose a reward propagation method via graph convolutional neural network [21]. Another line of works utilize episodic memory (EM) [37, 5, 73, 27, 74] to recall key events and aggregate information of the past for decision-making or learning. However, simply applying EM of RL to MARL cannot perform well in OBMA due to the non-stationarity and the displaced rewards.

**Multi-Agent RL.** Many MARL methods focus on factorizing the global Q value to train agents' policies via CTDE [13, 49, 41, 47, 60, 63, 35]. However, these existing works assume actions are executed synchronously. Messias et al. [30] propose an event-driven, asynchronous formulation of the multi-agent POMDP. However, the assumption of free communication [61] is limited and the asynchronous execution [34] in the paper is confined to the design of events and did not propose methods on solving challenging credit assignment issue in OBMA. Recently, Amato et al. [1] and Xiao et al. [67, 68] propose macro-action methods, which are similar to hierarchical methods. Macro-actions are manually designed via abstracting primitive actions. However, macro-action methods mainly focus on macro-action selection during multi-timestep decision-making and assume the environment can use manually pre-defined methods for state transition. Unfortunately, the above works either focus on synchronous actions or defining specific asynchronous execution components with human knowledge. Learning coordination in OBMA remains a challenge.

## 8 Conclusion

In this paper, we investigate model-free MARL with off-beat actions. To address challenges in OBMA, we first propose Off-Beat Dec-POMDP. Then, we propose a new class of episodic memory, LeGEM, for model-free MARL algorithms. LeGEM addresses the challenging temporal credit assignment problem raised by off-beat actions in TD-learning via the novel reward redistribution scheme. We evaluate our method on various OBMA scenarios. Empirical results show that our method significantly boosts the multi-agent coordination and achieves leading performance as well as improved sample efficiency.

**Limitations and Future Work.** Searching from a graph-structured episodic memory takes much overhead in LeGEM. Scaling up LeGEM to complex OBMA is our future direction. Recently, there is a growing interest in model-based planning [45]. Leveraging LeGEM for model-based planning is also our future work. Our paper focuses on Dec-POMDP-based MARL methods. We leave it to future work for investigating off-beat actions in frameworks like Markov Game [26] and MMDP [7]. We are also interested in finding the merit of our method in real-world problem in our future work, such as scheduling [29] with off-beat settings.

## References

- [1] C. Amato, G. Konidaris, L. P. Kaelbling, and J. P. How. Modeling and planning with macro-actions in decentralized pomdps. *Journal of Artificial Intelligence Research*, 64:817–859, 2019.
- [2] J. A. Arjona-Medina, M. Gillhofer, M. Widrich, T. Unterthiner, J. Brandstetter, and S. Hochreiter. RUDDER: Return decomposition for delayed rewards. In *Advances in Neural Information Processing Systems*, volume 32, 2019.
- [3] P.-L. Bacon, J. Harb, and D. Precup. The option-critic architecture. In *Proceedings of the AAAI Conference on Artificial Intelligence*, volume 31, 2017.
- [4] N. Biggs, E. K. Lloyd, and R. J. Wilson. *Graph Theory, 1736-1936*. Oxford University Press, 1986.
- [5] M. Botvinick, S. Ritter, J. X. Wang, Z. Kurth-Nelson, C. Blundell, and D. Hassabis. Reinforcement learning, fast and slow. *Trends in Cognitive Sciences*, 23(5):408–422, 2019.
- [6] Y. Bouteiller, S. Ramstedt, G. Beltrame, C. Pal, and J. Binas. Reinforcement learning with random delays. In *International Conference on Learning Representations*, 2020.
- [7] C. Boutilier. Planning learning and coordination in multiagent decision processes. In *Proceedings of the 6th Conference on the Theoretical Aspects of Rationality and Knowledge*, pages 195–210, 1996.
- [8] Y. Cao, W. Yu, W. Ren, and G. Chen. An overview of recent progress in the study of distributed multi-agent coordination. *IEEE Transactions on Industrial Informatics*, 9(1):427–438, 2012.
- [9] M. S. Charikar. Similarity estimation techniques from rounding algorithms. In *Proceedings of the thirty-fourth Annual ACM Symposium on Theory of Computing*, pages 380–388, 2002.
- [10] B. Chen, M. Xu, Z. Liu, L. Li, and D. Zhao. Delay-aware multi-agent reinforcement learning for cooperative and competitive environments. *arXiv e-prints*, pages arXiv–2005, 2020.
- [11] E. Derman, G. Dalal, and S. Mannor. Acting in delayed environments with non-stationary Markov policies. In *International Conference on Learning Representations*, 2020.
- [12] L. Espeholt, H. Soyer, R. Munos, K. Simonyan, V. Mnih, T. Ward, Y. Doron, V. Firoiu, T. Harley, I. Dunning, et al. Impala: Scalable distributed deep-RL with importance weighted actor-learner architectures. In *International Conference on Machine Learning*, pages 1407–1416, 2018.
- [13] J. Foerster, G. Farquhar, T. Afouras, N. Nardelli, and S. Whiteson. Counterfactual multi-agent policy gradients. *arXiv preprint arXiv:1705.08926*, 2017.
- [14] T. Gangwani, Y. Zhou, and J. Peng. Learning guidance rewards with trajectory-space smoothing. *Advances in Neural Information Processing Systems*, 33:822–832, 2020.
- [15] D. Ha and Y. Tang. Collective intelligence for deep learning: A survey of recent developments. *arXiv preprint arXiv:2111.14377*, 2021.
- [16] B. Han, Z. Ren, Z. Wu, Y. Zhou, and J. Peng. Off-policy reinforcement learning with delayed rewards. *arXiv preprint arXiv:2106.11854*, 2021.
- [17] H. Hu, J. Ye, G. Zhu, Z. Ren, and C. Zhang. Generalizable episodic memory for deep reinforcement learning. In *Proceedings of the 38th International Conference on Machine Learning*, pages 4380–4390, 18–24 Jul 2021.
- [18] C.-C. Hung, T. Lillicrap, J. Abramson, Y. Wu, M. Mirza, F. Carnevale, A. Ahuja, and G. Wayne. Optimizing agent behavior over long time scales by transporting value. *Nature Communications*, 10(1):1–12, 2019.
- [19] M. Hüttenrauch, A. Šošić, and G. Neumann. Guided deep reinforcement learning for swarm systems. In *AAMAS 2017 Autonomous Robots and Multirobot Systems (ARMS) Workshop*, 2017.

- [20] K. V. Katsikopoulos and S. E. Engelbrecht. Markov decision processes with delays and asynchronous cost collection. *IEEE Transactions on Automatic Control*, 48(4):568–574, 2003.
- [21] T. N. Kipf and M. Welling. Semi-supervised classification with graph convolutional networks. *arXiv preprint arXiv:1609.02907*, 2016.
- [22] M. Klissarov and D. Precup. Reward propagation using graph convolutional networks. *Advances in Neural Information Processing Systems*, 33, 2020.
- [23] J. G. Kuba, R. Chen, M. Wen, Y. Wen, F. Sun, J. Wang, and Y. Yang. Trust region policy optimisation in multi-agent reinforcement learning. *arXiv preprint arXiv:2109.11251*, 2021.
- [24] A. K. Lampinen, S. C. Chan, A. Banino, and F. Hill. Towards mental time travel: a hierarchical memory for reinforcement learning agents. In A. Beygelzimer, Y. Dauphin, P. Liang, and J. W. Vaughan, editors, *Advances in Neural Information Processing Systems*, 2021.
- [25] J. Z. Leibo, E. D. nez Guzmán, A. S. Vezhnevets, J. P. Agapiou, P. Sunehag, R. Koster, J. Matyas, C. Beattie, I. Mordatch, and T. Graepel. Scalable evaluation of multi-agent reinforcement learning with melting pot. PMLR, 2021.
- [26] M. L. Littman. Markov games as a framework for multi-agent reinforcement learning. In *Machine Learning Proceedings 1994*, pages 157–163. Elsevier, 1994.
- [27] X. Ma and W.-J. Li. State-based episodic memory for multi-agent reinforcement learning. *arXiv preprint arXiv:2110.09817*, 2021.
- [28] A. Mahajan, T. Rashid, M. Samvelyan, and S. Whiteson. MAVEN: Multi-agent variational exploration. In *Advances in Neural Information Processing Systems*, pages 7613–7624, 2019.
- [29] H. Mao, M. Schwarzkopf, S. B. Venkatakrishnan, Z. Meng, and M. Alizadeh. Learning scheduling algorithms for data processing clusters. In *Proceedings of the ACM special interest group on data communication*, pages 270–288. 2019.
- [30] J. V. Messias, M. T. Spaan, and P. U. Lima. Multiagent pomdps with asynchronous execution. In *Proceedings of the 2013 International Conference on Autonomous Agents and Multi-agent Systems*, pages 1273–1274, 2013.
- [31] V. Mnih, K. Kavukcuoglu, D. Silver, A. A. Rusu, J. Veness, M. G. Bellemare, A. Graves, M. Riedmiller, A. K. Fidjeland, G. Ostrovski, et al. Human-level control through deep reinforcement learning. *Nature*, 518(7540):529–533, 2015.
- [32] F. A. Oliehoek, C. Amato, et al. *A Concise Introduction to Decentralized POMDPs*, volume 1. Springer, 2016.
- [33] F. A. Oliehoek, M. T. Spaan, and N. Vlassis. Optimal and approximate q-value functions for decentralized POMDPs. *Journal of Artificial Intelligence Research*, 32:289–353, 2008.
- [34] S. Omidshafiei, A.-A. Agha-Mohammadi, C. Amato, and J. P. How. Decentralized control of partially observable markov decision processes using belief space macro-actions. In *2015 IEEE International Conference on Robotics and Automation (ICRA)*, pages 5962–5969, 2015.
- [35] L. Pan, T. Rashid, B. Peng, L. Huang, and S. Whiteson. Regularized softmax deep multi-agent q-learning. *Advances in Neural Information Processing Systems*, 34, 2021.
- [36] W. B. Powell. *Approximate Dynamic Programming: Solving the curses of dimensionality*, volume 703. John Wiley & Sons, 2007.
- [37] A. Pritzel, B. Uria, S. Srinivasan, A. P. Badia, O. Vinyals, D. Hassabis, D. Wierstra, and C. Blundell. Neural episodic control. In *International Conference on Machine Learning*, pages 2827–2836, 2017.
- [38] W. Qiu, X. Wang, R. Yu, R. Wang, X. He, B. An, S. Obraztsova, and Z. Rabinovich. RMIX: Learning risk-sensitive policies for cooperative reinforcement learning agents. In *Advances in Neural Information Processing Systems*, 2021.



- [39] S. Ramstedt and C. Pal. Real-time reinforcement learning. *Advances in Neural Information Processing Systems*, 32:3073–3082, 2019.
- [40] D. Raposo, S. Ritter, A. Santoro, G. Wayne, T. Weber, M. Botvinick, H. van Hasselt, and F. Song. Synthetic returns for long-term credit assignment. *arXiv preprint arXiv:2102.12425*, 2021.
- [41] T. Rashid, M. Samvelyan, C. Schroeder, G. Farquhar, J. Foerster, and S. Whiteson. QMIX: Monotonic value function factorisation for deep multi-agent reinforcement learning. In *International Conference on Machine Learning*, pages 4295–4304, 2018.
- [42] Z. Ren, R. Guo, Y. Zhou, and J. Peng. Learning long-term reward redistribution via randomized return decomposition. *arXiv e-prints*, pages arXiv–2111, 2021.
- [43] R. T. Rockafellar, S. Uryasev, et al. Optimization of conditional value-at-risk. *Journal of Risk*, 2:21–42, 2000.
- [44] M. Samvelyan, T. Rashid, C. S. de Witt, G. Farquhar, N. Nardelli, T. G. J. Rudner, C.-M. Hung, P. H. S. Torr, J. Foerster, and S. Whiteson. The StarCraft Multi-Agent Challenge. *CoRR*, abs/1902.04043, 2019.
- [45] J. Schrittwieser, I. Antonoglou, T. Hubert, K. Simonyan, L. Sifre, S. Schmitt, A. Guez, E. Lockhart, D. Hassabis, T. Graepel, et al. Mastering atari, go, chess and shogi by planning with a learned model. *Nature*, 588(7839):604–609, 2020.
- [46] D. Silver, S. Singh, D. Precup, and R. S. Sutton. Reward is enough. *Artificial Intelligence*, 299:103535, 2021.
- [47] K. Son, D. Kim, W. J. Kang, D. E. Hostallero, and Y. Yi. QTRAN: Learning to factorize with transformation for cooperative multi-agent reinforcement learning. In *International Conference on Machine Learning*, pages 5887–5896, 2019.
- [48] T. Suddendorf, D. R. Addis, and M. C. Corballis. Mental time travel and the shaping of the human mind. *Philosophical Transactions of the Royal Society B: Biological Sciences*, 364(1521):1317–1324, 2009.
- [49] P. Sunehag, G. Lever, A. Gruslys, W. M. Czarnecki, V. Zambaldi, M. Jaderberg, M. Lanctot, N. Sonnerat, J. Z. Leibo, K. Tuyls, et al. Value-decomposition networks for cooperative multi-agent learning. *arXiv preprint arXiv:1706.05296*, 2017.
- [50] R. S. Sutton. *Temporal credit assignment in reinforcement learning*. PhD thesis, University of Massachusetts Amherst, 1984.
- [51] R. S. Sutton and A. G. Barto. *Reinforcement Learning: An Introduction*. MIT press, 2018.
- [52] R. S. Sutton, D. Precup, and S. Singh. Between mdps and semi-mdps: A framework for temporal abstraction in reinforcement learning. *Artificial intelligence*, 112(1-2):181–211, 1999.
- [53] A. Tampuu, T. Matiisen, D. Kodelja, I. Kuzovkin, K. Korjus, J. Aru, J. Aru, and R. Vicente. Multiagent cooperation and competition with deep reinforcement learning. *PLoS ONE*, 12(4), 2017.
- [54] H. Tang, R. Houthoofd, D. Foote, A. Stooke, O. Xi Chen, Y. Duan, J. Schulman, F. DeTurck, and P. Abbeel. # exploration: A study of count-based exploration for deep reinforcement learning. *Advances in neural information processing systems*, 30, 2017.
- [55] E. Tulving. Memory and consciousness. *Canadian Psychology/Psychologie Canadienne*, 26(1):1, 1985.
- [56] H. van Hasselt, S. Madjiheurem, M. Hessel, D. Silver, A. Barreto, and D. Borsa. Expected eligibility traces. In *Proceedings of the AAAI Conference on Artificial Intelligence*, number 11, pages 9997–10005, 2021.

- [57] A. Vaswani, N. Shazeer, N. Parmar, J. Uszkoreit, L. Jones, A. N. Gomez, Ł. Kaiser, and I. Polosukhin. Attention is all you need. In *Advances in Neural Information Processing Systems*, pages 5998–6008, 2017.
- [58] O. Vinyals, I. Babuschkin, W. M. Czarnecki, M. Mathieu, A. Dudzik, J. Chung, D. H. Choi, R. Powell, T. Ewalds, P. Georgiev, et al. Grandmaster level in StarCraft II using multi-agent reinforcement learning. *Nature*, 575(7782):350–354, 2019.
- [59] T. J. Walsh, A. Nouri, L. Li, and M. L. Littman. Learning and planning in environments with delayed feedback. *Autonomous Agents and Multi-Agent Systems*, 18(1):83–105, 2009.
- [60] J. Wang, Z. Ren, T. Liu, Y. Yu, and C. Zhang. QPLEX: Duplex dueling multi-agent q-learning. *arXiv preprint arXiv:2008.01062*, 2020.
- [61] R. Wang, X. He, R. Yu, W. Qiu, B. An, and Z. Rabinovich. Learning efficient multi-agent communication: An information bottleneck approach. In *International Conference on Machine Learning*, pages 9908–9918. PMLR, 2020.
- [62] W. Wang, T. Yang, Y. Liu, J. Hao, X. Hao, Y. Hu, Y. Chen, C. Fan, and Y. Gao. Action semantics network: Considering the effects of actions in multiagent systems. *arXiv preprint arXiv:1907.11461*, 2019.
- [63] Y. Wang, B. Han, T. Wang, H. Dong, and C. Zhang. DOP: Off-policy multi-agent decomposed policy gradients. In *International Conference on Learning Representations*, 2021.
- [64] Z. Wang, T. Schaul, M. Hessel, H. Hasselt, M. Lanctot, and N. Freitas. Dueling network architectures for deep reinforcement learning. In *International Conference on Machine Learning*, pages 1995–2003, 2016.
- [65] C. J. Watkins and P. Dayan. Q-Learning. *Machine Learning*, 8(3-4):279–292, 1992.
- [66] T. Xiao, E. Jang, D. Kalashnikov, S. Levine, J. Ibarz, K. Hausman, and A. Herzog. Thinking while moving: Deep reinforcement learning with concurrent control. In *International Conference on Learning Representations*, 2019.
- [67] Y. Xiao, J. Hoffman, and C. Amato. Macro-action-based deep multi-agent reinforcement learning. In *Conference on Robot Learning*, pages 1146–1161. PMLR, 2020.
- [68] Y. Xiao, J. Hoffman, T. Xia, and C. Amato. Multi-agent/robot deep reinforcement learning with macro-actions (student abstract). In *Proceedings of the AAAI Conference on Artificial Intelligence*, volume 34, pages 13965–13966, 2020.
- [69] Y. Yuan and R. Mahmood. Asynchronous reinforcement learning for real-time control of physical robots. *arXiv preprint arXiv:2203.12759*, 2022.
- [70] T. Zahavy, B. O’Donoghue, G. Desjardins, and S. Singh. Reward is enough for convex mdps. *Advances in Neural Information Processing Systems*, 34, 2021.
- [71] L. Zheng, J. Chen, J. Wang, J. He, Y. Hu, Y. Chen, C. Fan, Y. Gao, and C. Zhang. Episodic multi-agent reinforcement learning with curiosity-driven exploration. *Advances in Neural Information Processing Systems*, 34, 2021.
- [72] M. Zhou, J. Luo, J. Vilella, Y. Yang, D. Rusu, J. Miao, W. Zhang, M. Alban, I. Fadarar, Z. Chen, et al. Smarts: Scalable multi-agent reinforcement learning training school for autonomous driving. *arXiv preprint arXiv:2010.09776*, 2020.
- [73] Y. Zhou, D. E. Asher, N. R. Waytowich, and J. A. Shah. On memory mechanism in multi-agent reinforcement learning. *arXiv e-prints*, pages arXiv–1909, 2019.
- [74] G. Zhu, Z. Lin, G. Yang, and C. Zhang. Episodic reinforcement learning with associative memory. In *International Conference on Learning Representations*, 2020.

## Checklist

### 1. For all authors...

- (a) Do the main claims made in the abstract and introduction accurately reflect the paper's contributions and scope? [Yes] See Sec. 4.
- (b) Did you describe the limitations of your work? [Yes] See Sec. 8.
- (c) Did you discuss any potential negative societal impacts of your work? [No] Our method does not have negative social impacts.
- (d) Have you read the ethics review guidelines and ensured that your paper conforms to them? [Yes]

### 2. If you are including theoretical results...

- (a) Did you state the full set of assumptions of all theoretical results? [Yes] See the statements.
- (b) Did you include complete proofs of all theoretical results? [Yes] See Appx. A.

### 3. If you ran experiments...

- (a) Did you include the code, data, and instructions needed to reproduce the main experimental results (either in the supplemental material or as a URL)? [Yes] See the supplementary files.
- (b) Did you specify all the training details (e.g., data splits, hyperparameters, how they were chosen)? [Yes] See Appx. E.
- (c) Did you report error bars (e.g., with respect to the random seed after running experiments multiple times)? [Yes] See Sec. 6 and Appx. E.
- (d) Did you include the total amount of compute and the type of resources used (e.g., type of GPUs, internal cluster, or cloud provider)? [Yes] See Appx. E.

### 4. If you are using existing assets (e.g., code, data, models) or curating/releasing new assets...

- (a) If your work uses existing assets, did you cite the creators? [Yes] We cited, see Sec. 6.
- (b) Did you mention the license of the assets? [Yes] See Appx. E.
- (c) Did you include any new assets either in the supplemental material or as a URL? [Yes] See the supplementary files.
- (d) Did you discuss whether and how consent was obtained from people whose data you're using/curating? [N/A]
- (e) Did you discuss whether the data you are using/curating contains personally identifiable information or offensive content? [N/A]

### 5. If you used crowdsourcing or conducted research with human subjects...

- (a) Did you include the full text of instructions given to participants and screenshots, if applicable? [N/A]
- (b) Did you describe any potential participant risks, with links to Institutional Review Board (IRB) approvals, if applicable? [N/A]
- (c) Did you include the estimated hourly wage paid to participants and the total amount spent on participant compensation? [N/A]

## 571 A Proofs

572 **Proposition 1.**  $\Gamma : \mathcal{Q} \mapsto \mathcal{Q}$  is a  $\gamma$ -contraction.

573 *Proof.* Recall that the Off-Beat Bellman operator  $\Gamma$  is defined as:

$$(\Gamma Q^{\text{tot}})(s, \tilde{u}) := \mathbb{E}[\Pi_{\Phi} R(s, \tilde{u}, m) + \gamma \max_{\tilde{u}'} Q^{\text{tot}}(s', \tilde{u}')] \quad (5)$$

574 The sup-norm is defined as  $\|Q\|_{\infty} = \sup_{s \in \mathcal{S}, \tilde{u} \in \mathcal{U}} |Q(s, \tilde{u})|$ . We consider the sup-norm contraction:

$$575 \quad \|(\Gamma Q_{(1)}^{\text{tot}})(s, \tilde{u}) - (\Gamma Q_{(2)}^{\text{tot}})(s, \tilde{u})\|_{\infty} \leq \gamma \|Q_{(1)}^{\text{tot}}(s, \tilde{u}) - Q_{(2)}^{\text{tot}}(s, \tilde{u})\|_{\infty} \quad (6)$$

576 We prove:

$$\begin{aligned} \left\| (\Gamma Q_{(1)}^{\text{tot}})(s, \tilde{u}) - (\Gamma Q_{(2)}^{\text{tot}})(s, \tilde{u}) \right\|_{\infty} &= \max_{s, \tilde{u}} \left| \gamma \sum_{s'} \mathcal{P}(s'|s, \tilde{u}) (\max_{\tilde{u}'} Q_{(1)}^{\text{tot}}(s', \tilde{u}') - \max_{\tilde{u}'} Q_{(2)}^{\text{tot}}(s', \tilde{u}')) \right| \\ &\leq \max_{s, \tilde{u}} \gamma \sum_{s'} \mathcal{P}(s'|s, \tilde{u}) \left| \max_{\tilde{u}'} (Q_{(1)}^{\text{tot}}(s', \tilde{u}') - Q_{(2)}^{\text{tot}}(s', \tilde{u}')) \right| \\ &\leq \max_{s, \tilde{u}} \gamma \sum_{s'} \mathcal{P}(s'|s, \tilde{u}) \max_{s'', \tilde{u}'} \left| Q_{(1)}^{\text{tot}}(s'', \tilde{u}') - Q_{(2)}^{\text{tot}}(s'', \tilde{u}') \right| \\ &= \max_{s, \tilde{u}} \gamma \sum_{s'} \mathcal{P}(s'|s, \tilde{u}) \left\| Q_{(1)}^{\text{tot}} - Q_{(2)}^{\text{tot}} \right\|_{\infty} \\ &= \gamma \left\| Q_{(1)}^{\text{tot}} - Q_{(2)}^{\text{tot}} \right\|_{\infty} \end{aligned} \quad (7)$$

577  $\square$

578 Readers may find that with the reward redistribution operator  $\Pi_{\Phi}$ , the reward is ordered. Consequently,  
579 Off-Beat Bellman equation is reduced to Bellman equation<sup>7</sup>.

---

<sup>7</sup>When all off-beat rewards are redistributed to the ground true pivot timestep, we can claim this finding.

## 580 B LeGEM for Off-Beat MARL

581 In this section, we list Alg. 4, Alg. 5, Alg. 6 and Alg. 7 in Sec. B.1 and present the training pipeline  
 582 for Off-Beat MARL in Alg. 9 in Sec. B.2. We also present lists of symbols for Dec-POMDP, Off-  
 583 Beat Dec-POMDP, MARL, Off-Beat MARL and LeGEM in Tab. 3, 4 and 5. To make pseudocode  
 584 easy to read, we use Python-like<sup>8</sup> syntax to represent vectors and hashmaps (look-up tables).

### 585 B.1 LeGEM

586 We also define the sub-graph set of  $\phi_i^t$  as  $\Phi_i^{t,\Omega} = \{\phi_i^{t,\omega}\}_{\omega=0}^{\Omega-1}$  by using the discretized episode  
 587 return and there are  $\Omega$  sub-graphs.  $\phi_i^{t,\omega}$  is the  $\omega$ -th sub-graph whose episode return is  $\Upsilon[\omega]$   
 588 ( $\omega \in \{0, \dots, \Omega-1\}$ ,  $\Upsilon = [0, \dots, \mathbf{r}^{t,i}]$ ) where  $\mathbf{r}^{t,i}$  is the discretized maximum episode return of  $\phi_i^t$ .

---

#### Algorithm 3: UpdateLeGEM

---

```

1 Input: Agent  $i$ 's  $\{\tau_i^d\}_{d=1}^D$  and  $\Phi_i$ .
2 for  $d \leftarrow 1$  to  $D$  do
3   Get  $\phi_i^l \leftarrow \Phi_i[\text{length}(\tau_i^d)-1]$ ; //  $\text{length}(\tau_i^d)-1$  equals  $l$ 
4   Calculate the discretized episode reward  $\mathbf{r}^{l,i}$ ;
5   Get the index  $\omega$  from  $\Upsilon$  by using  $\mathbf{r}^{l,i}$ ;
6   Get  $\phi_i^{l,\omega} \leftarrow \Phi_i^{l,\Omega}[\omega]$ ;
7   for  $t \leftarrow 0$  to  $\text{length}(\tau_i^d) - 1$  do
8     if  $(o_i^t, u_i^t) \in \phi_i^l$  then
589       // There is no need to update the node of sub-graph  $\phi_i^{l,\omega}$  as it shares
       the same node with  $\phi_i^l$ 
9        $\psi \leftarrow \phi_i^l.\text{getNode}(o_i^t, u_i^t)$ ;
10       $\psi.\text{visitCount}++$ ;
11     else
12       $\psi \leftarrow \text{newNode}(o_i^t, u_i^t, \mathbf{r}^t)$ ;
13       $\phi_i^l.\text{append}(\psi)$ ;
14       $\phi_i^l.\text{updatePointers}(\psi)$ ; // Sub-graph  $\phi_i^{l,\omega}$  shares the same node with  $\phi_i^l$ 
15       $\phi_i^{l,\omega}.\text{append}(\psi)$ ;
16       $\phi_i^{l,\omega}.\text{updatePointers}(\psi)$ ;
17 Return:  $\Phi_i$ .

```

---

590 Alg. 3 shows the whole procedure to construct the graph. To illustrate it, we provide an example  
 591 below (Fig. 9) to show how to construct the graph. Fig. 2 shows the relationship between sub-graphs  
 592 and the graphs.

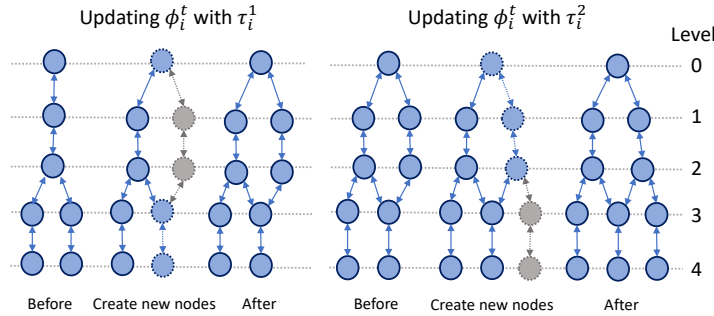

Figure 9: **Updating agent  $i$ 's  $\Phi_i$ :** Agent  $i$ 's  $\phi_i^t$  is updated with agent's trajectories  $\tau_i^1$  and then updated with  $\tau_i^2$ . Solid arrows and circles indicate the pointers and nodes, respectively. Grey dotted lines indicate pointers to be created and grey circles with dotted outlines indicate nodes to be created. All the dotted elements (pointers and circles) consist of a new path in  $\tau_i^1$ . All the created pointers and nodes will be added to  $\phi_i^t$ .

---

<sup>8</sup><https://www.python.org/>

---

**Algorithm 4: VisitCount**

---

```
1 Input:  $\Lambda_i^{t,l}$ .  
2 Initialize:  $vc \leftarrow []$ , an empty vector to store visit count mask for each path in  $\Lambda_i^{t,l}$ .  
3 foreach  $path \Lambda_i^{t,l}[j] \in \Lambda_i^{t,l}$  do  
4    $pathVC \leftarrow \text{sort}(\text{set}([node.visitCount \text{ for } node \text{ in } \Lambda_i^{t,l}[j]]))$ ;  
5   Create an empty look-up table  $tb \leftarrow \{\}$ ;  
593 6   foreach  $index k \in pathVC$  do  
7      $tb[pathVC[k]] \leftarrow k$ ;  
8   Create an empty vector  $ls \leftarrow []$ ;  
9   foreach  $node \in trajectory \Lambda_i^{t,l}[j]$  do  
10     $ls.append(tb[node.visitCount])$ ;  
11     $vc.append(ls)$ ;  
12 Return:  $vc$ .
```

---

---

**Algorithm 5:** UL

---

```
1 Input:  $\Lambda_i^{t,l}[j]$ ,  $vc$ ,  $\tau_i$ .
2 Initialize:  $e_t^{i,j,\downarrow} \leftarrow -1$ ,  $res \leftarrow []$ . // Initialize the return value and an empty vector
3  $vc \leftarrow vc[:t]$ ; // Slicing the visit count
4  $left \leftarrow 0$ ,  $right \leftarrow 1$ ; // Create two pointers
5 while  $right < \text{size}(vc)$  do
6   if  $vc[right] = vc[left]$  then
7      $right++$ ; // Non-decreasing pattern
8   else if  $vc[right] > vc[left]$  then
594 9      $res.append(right)$ ;
10      $left \leftarrow right$ ;
11      $right++$ ;
12   else
13     break; // Break the while loop
14 if  $\text{size}(res) = 0$  then
15    $e_t^{i,j,\downarrow} \leftarrow -1$ ;
16 else
17    $e_t^{i,j,\downarrow} \leftarrow res[-1]$ ; // Get the last value of res
18 Return:  $e_t^{i,j,\downarrow}$ .
```

---



---

**Algorithm 6:** LU

---

```
1 Input:  $\Lambda_i^{t,l}[j]$ ,  $vc$ ,  $\tau_i$ .
2 Initialize:  $e_t^{i,j,\uparrow} \leftarrow -1$ ,  $res \leftarrow []$ . // Initialize the return value and an empty vector
3  $vc \leftarrow reverse(vc[:t])$ ; // Slicing the visit count and then reverse
4  $left \leftarrow 0$ ,  $right \leftarrow 1$ ; // Create two pointers
5 while  $right < size(vc)$  do
6   if  $vc[right] = vc[left]$  then
7      $right++$ ; // Non-increasing pattern
8   else if  $vc[right] > vc[left]$  then
9      $res.append(right)$ ;
10     $left \leftarrow right$ ;
11     $right++$ ;
12   else
13     break; // Break the while loop
14 if  $size(res) = 0$  then
15    $e_t^{i,j,\uparrow} \leftarrow -1$ ;
16 else
17    $e_t^{i,j,\uparrow} \leftarrow res[-1]$ ; // Get the last value of res
18    $e_t^{i,j,\uparrow} \leftarrow size(vc) - e_t^{i,j,\uparrow} - 1$ ; // Get the right timestep as vc is reversed
19 Return:  $e_t^{i,j,\uparrow}$ .
```

---

---

**Algorithm 7: Summarize**

---

```
1 Input:  $e_t^i$ . // Receives a vector of pivot timesteps
// Get the pivot timestep with the maximum count
596 // Since getValueOfMaxCount(.) is easy to implement, for brevity, we do not
    present its implementation here
2  $e_t^i \leftarrow \text{getValueOfMaxCount}(e_t^i)$ ;
3 Return:  $e_t^i$ .
```

---

---

**Algorithm 8:** Search Scheme II

---

```
1 Input:  $\omega, \Lambda_i^{t,l}, \tau_i, \mathbf{r}^{l,i}, \Upsilon$  and  $\Phi_i$ .
2 Initialize:  $e_t^i \leftarrow -1$ ; // Initialize the results
3 Initialize:  $\text{tb} \leftarrow \{\}$ ; // Initialize a empty look-up table
4 foreach path  $\Lambda_i^{t,l}[j] \in \Lambda_i^{t,l}$  do
    // Search backwards from  $t-1$  to 0
5     foreach node  $j = t-1 \in \Lambda_i^{t,l}[j]$  to 0 do
6          $\text{tb}[j] \leftarrow \{\}$ ;
7         if new node then
597         |  $\text{tb}[j][\text{node}] = 1$ ;
8         else
9         |  $\text{tb}[j][\text{node}]++$ ;
10
11 if the size of each  $\text{tb}[j]$  equals the size of  $\Lambda_i^{t,l}$  then
12 |  $e_t^i \leftarrow -1$ ;
13 else
14 | Get the timestep  $j'$  whose length of  $\text{tb}[j']$  is the smallest one;
15 |  $e_t^i \leftarrow j'$ ;
16 Return:  $e_t^i$ .
```

---

## 598 B.2 Off-Beat MARL Training

599 We present the pseudo code of incorporating LeGEM into model-free MARL method in Alg. 9. Lines  
600 4-5 show that agents commit actions into the environment and then agents save the trajectories into  
601 the buffer. Agents update their individual episodic memory in line 6. In lines 7-13, agents' policies  
602 are trained with TD learning (line 10) by searching agent's episodic memories (line 9). We also  
603 provide a pictorial view of our framework in Fig. 3 to show the whole pipeline of MARL learning.

---

### Algorithm 9: Off-Beat MARL Training

---

```

1 Input: initialize parameters  $\bar{\theta}$  and  $\theta$  of the network and the target network of agents, replay buffer  $\mathcal{D}$  and  $\Phi$ ;
2 for  $j \leftarrow 1$  to  $max\_episode$  do
3   while episode_not_terminated do
4     All agents commit actions  $\tilde{\mathbf{u}}_i^t$  into environment;
5     Collect  $(\mathbf{s}^t, \{o_i^t\}_{i=1}^N, \tilde{\mathbf{u}}^t, r^t, \mathbf{s}')$ ; save it into  $\mathcal{D}$ ;
6     Call UpdateLeGEM (Alg. 3);
7     if update_the_model then
8       Sample a min-batch  $\mathcal{D}'$  from  $\mathcal{D}$ ;
9       For each sample in  $\mathcal{D}'$ , get  $e_t$  by calling SearchPivotTimesteps (Alg. 1);
10      Calculate the TD target with Eqn. 2 and 4;
11      Update  $\theta$  by minimizing the TD loss;
12      if update then
13        | Update  $\bar{\theta}$ :  $\bar{\theta} \leftarrow \theta$ ;
14 Return: A well-trained policy for each agent.

```

---

## 604 B.3 List of Symbols

Table 3: List of Symbols for Dec-POMDP and Off-Beat Dec-POMDP

| Symbol                 | Meaning                                                     |
|------------------------|-------------------------------------------------------------|
| $\mathcal{S}$          | The state space                                             |
| $\mathcal{U}$          | The action space                                            |
| $\mathcal{P}$          | The transition probability                                  |
| $R$                    | The reward function                                         |
| $\mathcal{R}$          | The reward space                                            |
| $O$                    | The observation function                                    |
| $\mathcal{O}$          | The observation space                                       |
| $\mathcal{N}$          | The index set agents                                        |
| $\mathbf{s}$           | The current global state                                    |
| $\mathbf{u}$           | The current action                                          |
| $\mathbf{s}'$          | The next global state                                       |
| $\gamma$               | The discount factor                                         |
| $i$                    | The index of agent $i$                                      |
| $u_i$                  | The action of agent $i$ at current timestep                 |
| $N$                    | The number of agents                                        |
| $\mathcal{T}$          | The agent's action-observation-reward history space         |
| $\tau_i$               | Agent's action-observation-reward history                   |
| $\tilde{\mathbf{u}}$   | Agent's off-beat action                                     |
| $m_{\tilde{u}_i}$      | The execution duration of agent $i$ 's action $\tilde{u}_i$ |
| $A$                    | The action duration distribution                            |
| $\mathcal{A}$          | The space of the action duration distribution               |
| $\tilde{\mathbf{u}}$   | The joint off-beat action                                   |
| $\tilde{\mathbf{u}}_t$ | The joint off-beat action at timestep $t$                   |
| $\mathbf{m}$           | The execution duration of $\tilde{\mathbf{u}}$              |
| $\mathbf{m}_t$         | The execution duration of $\tilde{\mathbf{u}}_t$            |

Table 4: List of Symbols for MARL and Off-Beat MARL

| Symbol           | Meaning                                                                                               |
|------------------|-------------------------------------------------------------------------------------------------------|
| $Q_i$            | Agent $i$ 's Q value                                                                                  |
| $Q^{\text{tot}}$ | The global Q value of all agents                                                                      |
| $Q^*$            | The optimal global Q value of all agents                                                              |
| $\theta$         | The parameters of the agents (including agent's network, and networks for learning $Q^{\text{tot}}$ ) |
| $\bar{\theta}$   | The parameter of the target network                                                                   |
| $D'$             | A sample from the replay buffer                                                                       |
| $\mathcal{D}$    | The replay buffer                                                                                     |
| $e_t$            | The pivot timestep for $r_t$                                                                          |
| $\Gamma$         | The Off-Beat Bellman operator                                                                         |
| $\hat{r}^{e_t}$  | The redistributed reward                                                                              |
| $\Pi_\Phi$       | The reward redistribution operator                                                                    |

Table 5: List of Symbols for LeGEM

| Symbol              | Meaning                                                                               |
|---------------------|---------------------------------------------------------------------------------------|
| $\tau_i$            | Agent $i$ 's observation-action-reward trajectory                                     |
| $t_i$               | Agent $i$ 's observation at timesetp $t$                                              |
| $\tilde{u}_i^t$     | Agent $i$ 's off-beat action at timesetp $t$                                          |
| $r^t$               | The global reward at timestep $t$                                                     |
| $T$                 | The length of the $\tau_i$                                                            |
| $\Phi$              | The set of LeGEM                                                                      |
| $\Phi_i$            | The set of agent $i$ 's LeGEM                                                         |
| $\phi_i^t$          | Agent $i$ 's LeGEM whose maximum level is $t$                                         |
| $\Psi$              | The set of nodes                                                                      |
| $\Xi$               | The set of edges                                                                      |
| $\omega$            | The index of episode return                                                           |
| $\Omega$            | The length of the episode return list $\Upsilon$                                      |
| $\phi_i^{t,\omega}$ | Agent $i$ 's $\omega$ -th sub-graph of which maximum level is $t$                     |
| $\Phi_i^{t,\Omega}$ | Agent $i$ 's set of sub-graphs of which maximum level is $t$                          |
| $\Upsilon$          | The episode return list                                                               |
| $\Upsilon[\omega]$  | The $\omega$ -th episode return                                                       |
| $\mathbf{r}^{t,i}$  | The discretized maximum episode return of $\phi_i^t$                                  |
| $l$                 | the index of the $l$ -th level in the graph.                                          |
| $\Lambda_i^t$       | All the paths from node at level $t$ to node at the level 0                           |
| $e_t$               | The pivot timestep for $r_t$                                                          |
| $e_t^i$             | Agent $i$ 's pivot timestep for $r_t$                                                 |
| $\mathbf{e}_t^i$    | The vector of agent $i$ 's pivot timestep of each path in $\Lambda_i^{t,l}$ for $r_t$ |

#### 605 B.4 Intuition Behind the Search Schemes

606 In this subsection, we provide the intuition behind the search schemes. It is worth noting that the  
 607 search schemes in this paper aim to search the pivot time step where the key action was committed  
 608 into the environment and the reward was returned after some time steps.

609 **Node Co-Occurrence.** Intuitively, when an off-beat reward is found in the trajectory, we can search  
 610 backwards and find the actions committed by all agents. This is called Action-Reward Association.  
 611 We restate it (Fact 1) below. In graph, we name it node co-occurrence since the node of the off-  
 612 beat reward and nodes of off-beat actions exist in the graph. The key of the node in LeGEM is a tuple  
 613 of observation and action.

614 **Fact 1.** (Action-Reward Association) *When an off-beat reward  $r_t$  exists in the trajectory  $\tau_i$  ( $i \in$   
 615  $\{1, \dots, N\}$ ),  $r_t \in \tau_i$ , off-beat action  $u_{t'}$  exists ( $t' < t$ ) in the trajectory set  $\{\tau_j\}_{j=1}^N$ , where  $\{\tau_j\}_{j=1}^N$   
 616 constitutes the global trajectory of all agents.*

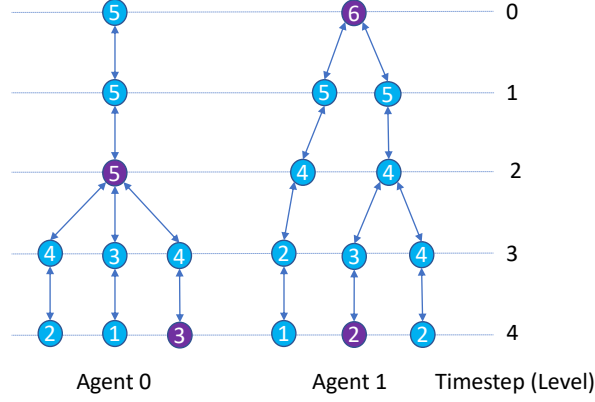

Figure 10: An example of node co-occurrence. There are two graphs. The circle indicates the nodes and the arrow stands for the edges. The number in each node is the visit count. Nodes in purple are nodes where off-beat actions are committed or off-beat rewards occur.

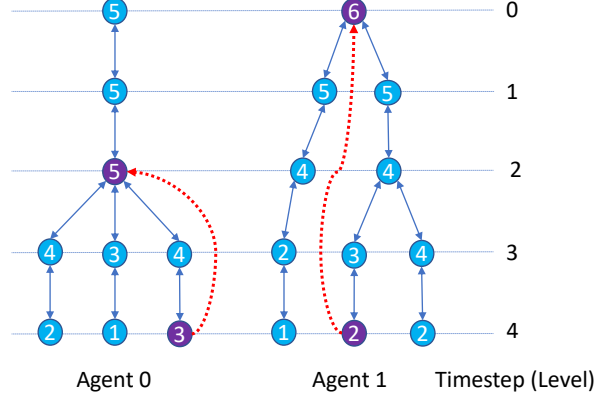

Figure 11: An example of search.

617 In Fig. 10, we present an example to showcase the node co-occurrence. The example is a simplified  
 618 two-agent stag-hunter game as depicted in Fig. 1, Sec.1. There are two agents and each agent can  
 619 only select SHOOT or NOOP. The SHOOT action of agent 0 takes the action duration of 2 to hit the  
 620 stag while The SHOOT action of agent 1 takes 4 timesteps to hit the stag. The task is to hit the stag  
 621 at the same time by 2 arrows shot by the two agents. By interacting with the environment, many  
 622 trajectories are collected by the agents and agents' graphs are built. At timestep 0, agent 1 executes  
 623 an off-beat action (SHOOT) and agent 0 commits an off-beat action (SHOOT) into the environment  
 624 at timestep 2. At timestep 4, the stag is captured and an off-beat reward occurs due to the action  
 625 duration. We can get the observation and the action at timestep 4 and then find the corresponding

626 nodes (in purple) for agent 0 and agent 1. Nodes that contain the off-beat action are also in purple.  
627 With the property of the node co-occurrence and Fact 1, we can search the nodes (i.e., timesteps) that  
628 are related to the off-beat rewards.

629 **Searching.** We can search the nodes (i.e., timesteps) that are related to the off-beat rewards via  
630 searching methods. As the visit count number provides the information of the occurrence between  
631 the node of the off-beat reward and the node of the off-beat action, we can utilise this pattern via  
632 searching backwards. As depicted in Fig.11, the searched timesteps are 2 and 0 for agent 0 and agent  
633 1, respectively. The search processes are show with dotted red arrows. Now, there are two candidates  
634 of the pivot timestep and we can redistribute the reward (agents share a global reward) to the chosen  
635 pivot timestep. We select the candidate timestep that is closest to the timestep of the off-beat reward  
636 as the pivot timestep. Besides that, we tried two other ranking methods:

- 637 1. We redistribute the reward to the searched pivot time step  $t$ , which is the farthest time step  
638 from the time step of the reward. At time step  $t$ , an off-beat action was committed to the  
639 environment. However, the result is not as good as the one presented in our paper. The  
640 reasons are (i) the action taken at time step  $t$  is not the key action to the reward. In OBMA,   
641 for example, in the scenario in Fig. 1 in our paper, action SHOOT is taken by agent one at time  
642 step 5 is the key action to the reward at time step 9; (ii) In Dec-POMDP MARL methods, we  
643 use RNN in the policy network to mitigate the issue raised by partial observation. The RNN  
644 can backpropagate the redistributed reward at the pivot timestep to the time steps before  
645 it. Besides that, the Bellman update can also backpropagate the redistributed reward to Q  
646 values of state-action pairs before the pivot timestep.
- 647 2. We redistribute reward at time step  $t$  (with LeGEM, the pivot time step is  $t'$ ) to all time  
648 steps where off-beat actions were taken. This scheme did not perform well either. The main  
649 reason is that the redistributed reward to time steps before the time step  $t'$  can overweigh the  
650 corresponding Q values.

651 Therefore, we use the ranking method as introduced in Eqn. 1, Sec. 4.2. Rewards are redistributed in  
652 Eqn. 2, Sec. 5 for TD-learning in multi-agent reinforcement learning. We also present the pseudo  
653 code of training in Alg. 9 and a pictorial view of our framework in Fig. 3 (in main text) to show the  
654 whole pipeline.



## 655 C Environments

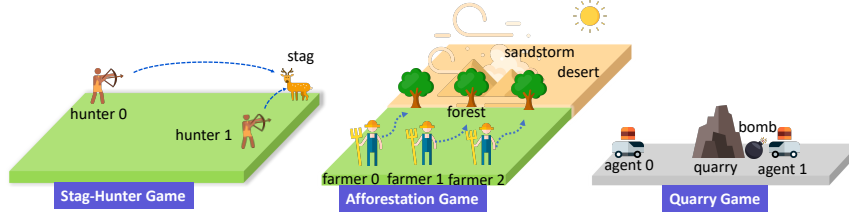

Figure 12: Stag-hunter Game, Quarry Game and Afforestation Game.

### 656 C.1 Stag-Hunter Game

657 As depicted in Fig. 12, there are  $n$  agents whose action durations are different; the task is to catch the  
 658 stag by shooting it simultaneously for all agents. Agents cannot move and the distance between the  
 659 agent and the stag is different. The stag will escape when hit by  $j \in \{1, \dots, n-1\}$  arrows. In this  
 660 case, agents will receive a positive reward given the number of arrows that successfully shoot the  
 661 stag. In Sec. 6, the environment dimension of the Stag-Hunter Game is  $15 \times 15$  and maximum time  
 662 steps is 14. At each time step, each agent can only observe its position and the position of the stag. It  
 663 cannot observe the position of other agents. Agents can select SHOOT or NOOP actions. SHOOT means  
 664 shooting the arrow and NOOP means no actions to be executed. For agent 0, the action duration of  
 665 its SHOOT action is 14 while the action duration of agent 1 SHOOT action is 6. When agent 1 shoots  
 666 the arrow at timestep 0, all agents will receive a positive reward at the end of the episode, making it  
 667 challenging for TD learning to calculate the exact contribution of each agent.

### 668 C.2 Quarry Game

669 There are  $n$  agents in a quarry, as shown in Fig. 12. Agents' task is to complete the  $n$ -explosive  
 670 installation task, and only when all the explosives detonate will agents receive the optimal positive  
 671 reward. After the installation, agents should go to the safe zones. Otherwise, agents will die and  
 672 receive a negative reward when the explosive detonates. Agents will receive a medium-level reward  
 673 given the number of detonated explosives. The explosive has different period to detonate after the  
 674 installation. At each time step, each agent can observe its position, the position of the quarry, the  
 675 position of the explosive set by the agent (if any) and the time seconds left for the explosive set by  
 676 the agent (if any). The agent can select MOVE\_LEFT, MOVE\_RIGHT, NOOP or INSTALL\_EXPLOSIVE  
 677 actions at each time step. Note that each agent cannot observe the status of the other agents and others'  
 678 explosives. Episode ends after the maximum timesteps or the explosive detonates. To complete the  
 679 task, agents should place the explosive at the right timestep and return to the safe zone.

### 680 C.3 Afforestation Game

681 In Fig. 12, there are  $n$  farmer agents in the farm. To the north of the farm, there is a desert. In the  
 682 early spring, strong sandstorms may gust from the north and destroy the farm. In order to protect  
 683 the farm, farm agents should plant trees in the north of the farm. Only when trees are tall enough  
 684 can they protect the farm. Trees can have different durations to grow, making the off-beatness of the  
 685 planting action. Agents receive the optimal positive reward when there are  $n$  trees can protect the  
 686 farm before the sandstorm. Note that agents have partial observations and will receive a reward of  
 687  $-0.1$  at each timestep in all scenarios shown in Fig. 12. At each time step, each agent can observe its  
 688 position, the position of the trees planted by itself and the status (position and the age of the tree)  
 689 of the sandstorm (if any). The agent cannot observe the other agents' positions and trees planted by  
 690 other agents. Agents can take MOVE\_NORTH, MOVE\_SOUTH, NOOP or PLANT\_TREE actions. Similar to  
 691 Quarry Game and Stag-Hunter, agents should take the right action at the right timestep to complete  
 692 the task. At the last timestep of the episode, the sandstorm will gust and if there are enough trees to  
 693 protect the farm, the task will be success. Note that agents should return to the safe zone when the  
 694 sandstorm comes. Otherwise, agents will receive a fraction of the punishment. Agents will receive  
 695 rewards when they fail to return to the safe zone. The reward is proportional to the number of agents  
 696 who fail to return to the safe zone.

#### 697 **C.4 SMAC**

698 We introduce the off-beat action into SMAC [44]. To make reasonable changes of the environment,  
699 we select the ATTACK actions as off-beat actions for SMAC scenarios. The rest actions, including  
700 MOVE, NOOP will be executed immediately into the environment after inference. At each time step,  
701 agents get local observations within their field of view, which contains information (relative x, relative  
702 y, distance, health, shield, and unit type) about the map within a circular area for both allied and  
703 enemy units and makes the environment partially observable for each agent. All features, both in  
704 the global state and in individual observations of agents, are normalized by their maximum values.  
705 Actions are in the discrete space: move[direction], attack[enemy id], stop and no-op. The no-op  
706 action is the only legal action for dead agents. Agents can only move in four directions: north, south,  
707 east, or west.

## D Baselines

We introduce the baselines evaluated in the experimental section. All baselines are summarized in Table 6.

**IQL** [53]: IQL is an independent Q-learning method for multi-agent RL. Each agent learns its Q values independent with Q-learning [65].

**VDN** [49]: VDN uses a linear combination of individual Q values to approximate the  $Q^{\text{tot}}(\boldsymbol{\tau}, \mathbf{u})$  as  $Q^{\text{tot}} = \sum_{i=1}^N Q_i(\tau_i, u_i)$ .

**QMIX** [41]: QMIX introduces the monotonic constraint on the relationship between  $Q^{\text{tot}}$  and  $Q_i$ :

$$\frac{\partial Q^{\text{tot}}(\boldsymbol{\tau}, \mathbf{u})}{\partial Q_i(\tau_i, u_i)} \geq 0, \forall i \in \{1, 2, \dots, N\}$$

where  $Q^{\text{tot}}(\boldsymbol{\tau}, \mathbf{u}) = f_m(Q_1(\tau_1, u_1), \dots, Q_N(\tau_N, u_N))$  and  $f_m$  is a mixing network used to approximate the  $Q^{\text{tot}}$ .

**QTRAN** [47]: QTRAN factorize the  $Q_{\text{jt}}(\boldsymbol{\tau}, \mathbf{u})$  with transformation:

$$\sum_{i=1}^N Q_i(\tau_i, u_i) - Q_{\text{jt}}(\boldsymbol{\tau}, \mathbf{u}) + V_{\text{jt}}(\boldsymbol{\tau}) = \begin{cases} 0 & \mathbf{u} = \bar{\mathbf{u}} \\ \geq 0 & \mathbf{u} \neq \bar{\mathbf{u}} \end{cases}$$

where  $V_{\text{jt}}(\boldsymbol{\tau}) = \max_{\mathbf{u}} Q_{\text{jt}}(\boldsymbol{\tau}, \mathbf{u}) - \sum_{i=1}^N Q_i(\tau_i, u_i)$ .

**QPLEX**[60]: Wang et al. [60] utilizes the established dueling structure  $Q = V + A$  [64], advantage function and attention network [57] and introduces the following factorization:

$$\begin{aligned} Q_{\text{tot}}(\boldsymbol{\tau}, \mathbf{u}) &= V_{\text{tot}}(\boldsymbol{\tau}) + A_{\text{tot}}(\boldsymbol{\tau}, \mathbf{u}) \\ V_{\text{tot}}(\boldsymbol{\tau}) &= \max_{\mathbf{u}'} Q_{\text{tot}}(\boldsymbol{\tau}, \mathbf{u}') \\ Q_i(\tau_i, a_i) &= V_i(\tau_i) + A_i(\tau_i, a_i) \\ V_i(\tau_i) &= \max_{a'_i} Q_i(\tau_i, a'_i) \end{aligned}$$

**EMC** [71]: EMC is MARL episodic memory method that utilizes episodic memory of RL [74, 17] in MARL curiosity-driven exploration.

**$N$ -step Return and TD( $\lambda$ ) methods** [50, 51]:  $N$ -step Return and TD( $\lambda$ ) are methods for Q value prediction.

**MAVEN** [28]: MAVEN builds a latent space with mutual information for multi-agent exploration.

**RMIX** [38]: RMIX aims to learn risk-sensitive policies for MARL. It replaces the Q value policy with CVaR [43] for risk-sensitive policy learning.

Table 6: Baseline algorithms.

| Categories                   | Methods                                |
|------------------------------|----------------------------------------|
| MARL Baselines ( <b>Q1</b> ) | QMIX[41]                               |
|                              | VDN [49]                               |
|                              | IQL [53]                               |
|                              | QTRAN [47]                             |
|                              | QPLEX [60]                             |
| EM ( <b>Q2</b> )             | EMC [71]                               |
| Bootstrap ( <b>Q3</b> )      | N-step Return & $\lambda$ -Return [51] |
| Ex-Risk ( <b>Q4</b> )        | MAVEN [28]                             |
|                              | EMC [71]                               |
|                              | RMIX [38]                              |

## 729 E Experiment Settings

730 We implement our method on PyMARL [44] and use 10 random seeds to train each method on  
 731 all environments. We use opensourced code of baselines publicly by the corresponding authors on  
 732 Github in all experiments. We use the default settings of PyMARL in our research, including the  
 733 relay buffer, the mixing network, the training hyperparameters. In order to explore, we use  $\epsilon$ -greedy  
 734 with  $\epsilon$  annealed linearly from 1.0 to 0.05 over 50K time steps from the start of training and keep it  
 735 constant for the rest of the training for all methods. The discount factor  $\gamma = 0.99$  and we follow the  
 736 default hyper-parameters used in the original papers of all methods in our research. We carry out  
 737 experiments on NVIDIA A100 Tensor Core GPU and NVIDIA GeForce RTX 3090 24G. We resort  
 738 to mean-std values as our performance evaluation measurement. We use  $\beta = 0.00001$  in Eqn. 2. To  
 739 create sub-graphs in LeGEM, we first calculate the episode return and keep 1 decimal of it. We then  
 740 use this episode return to create each sub-graph. We list some important hyper-parameters in Tab. 7.

Table 7: Hyper-parameters

| hyper-parameter         | Value              |
|-------------------------|--------------------|
| Optimizer               | RMSProp            |
| Learning rate           | 5e-4               |
| RMSProp alpha           | 0.99               |
| RMSProp epsilon         | 0.00001            |
| Gradient norm clip      | 10                 |
| Batch size              | 32                 |
| Replay buffer size      | 5,000              |
| Exploration method      | $\epsilon$ -greedy |
| $\epsilon$ -start       | 1.0                |
| $\epsilon$ -finish      | 0.05               |
| $\epsilon$ -anneal time | 50,000 steps       |
| $\gamma$                | 0.99               |
| $\beta$                 | 0.00001            |
| Evaluation interval     | 10,000             |
| Target update interval  | 200                |

## F Experiment Results

### F.1 $n$ -step return and TD( $\lambda$ )

We provide additional experiment results on  $n$ -step return and TD( $\lambda$ ). As illustrated in Fig. 13 and 14, QMIX can attain acceptable performance with some specific values of  $n$  and  $\lambda$  in Stag-Hunter Game. However, there is no convincing improvements of performance of VDN, QTRAN and IQL. On Quarry Game (Fig. 15 and 16) and Afforestation Game (Fig. 17 and 18), we can find that TD( $\lambda$ ) cannot help to improve the performance of MARL methods. We can conclude that  $n$ -step and TD( $\lambda$ ) have limited ability on improving the performance of MARL methods on OBMA.

In addition to the empirical results of  $n$ -step and TD( $\lambda$ ) returns, we present the results of MARL methods on Afforestation Game. In Fig. 19, we can find that with LeGEM, all four methods get improved performance. We also compare QMIX-LeGEM and VDN-LeGEM with EMC, MAVEN, QPLEX, and RMIX. Despite the simple structure of VDN, VDN-LeGEM performs well and even outperforms QMIX-LeGEM, demonstrating comparable performance with RMIX as depicted in Fig. 7. In Afforestation Game, agents will receive reward when they fail to return to the safe zone. The reward is proportional to the number of agents who fail to return to the safe zone. Such a clear and simple reward rule (*i.e.*, a “hint” for agents) makes learning much easier than that on Quarry and Stag-Hunter Game. This is the main reason why RMIX performs well. We can also find that MAVEN is also showing good performance due to its latent space learning model, which can efficiently learn the environment dynamics of Afforestation Game. QMIX-LeGEM also shows good performance and it outperforms EMC and QPLEX.

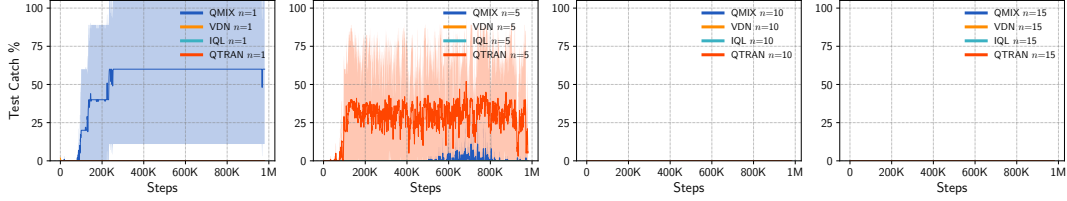

Figure 13: Results of  $n$ -step return Stag-Hunter Game.

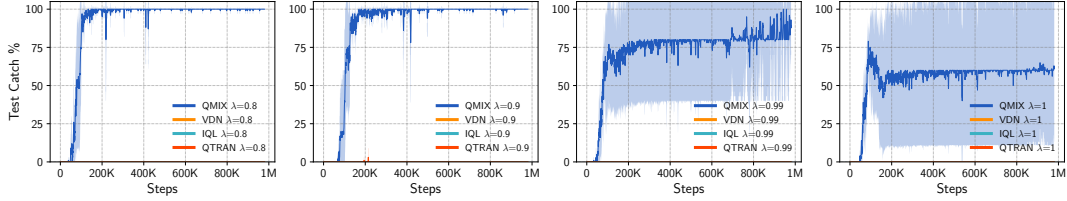

Figure 14: Results of TD( $\lambda$ ) Stag-Hunter Game.

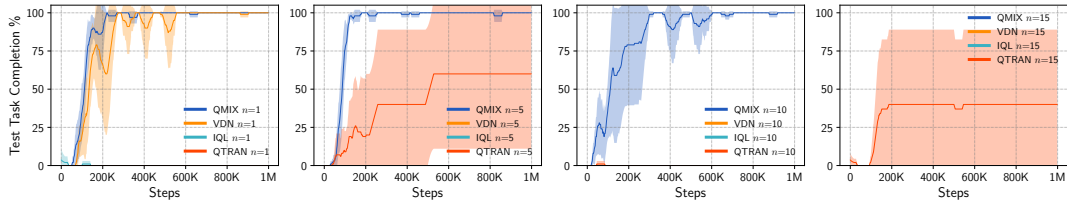

Figure 15: Results of  $n$ -step return Quarry Game.

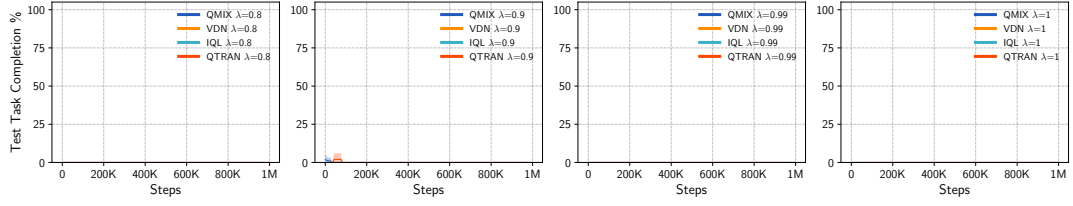

Figure 16: Results of TD( $\lambda$ ) Quarry Game.

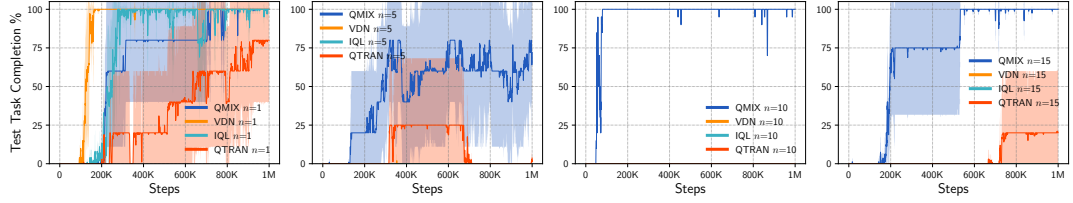

Figure 17: Results of  $n$ -step return Afforestation Game.

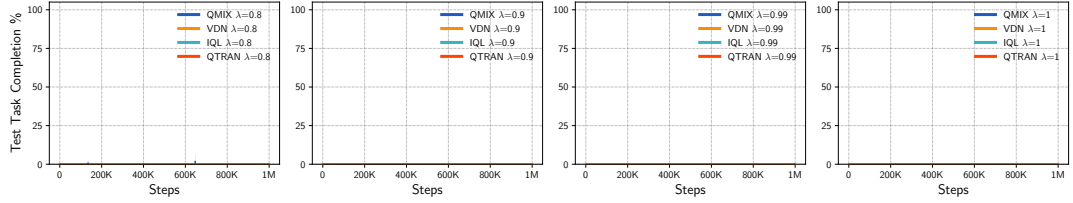

Figure 18: Results of TD( $\lambda$ ) Afforestation Game.

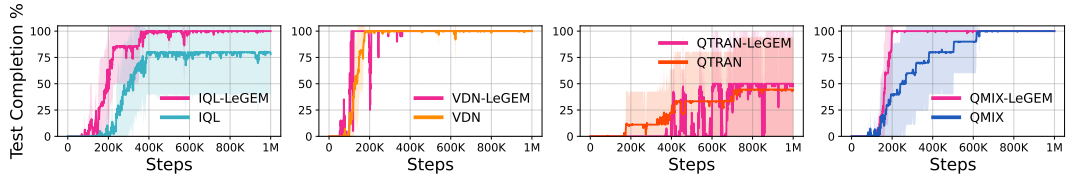

Figure 19: Results on Afforestation Game.

## 761 F.2 RUDDER

762 We present results of QMIX-RUDDER, VDN-RUDDER, IQL-RUDDER and QTRAN-RUDDER on  
 763 Stag-Hunter Game, Quarry Game, Afforestation Game and SMAC via incorporating RUDDER [2]  
 764 into QMIX, VDN, IQL and QTRAN. As rewards in off-beat Dec-POMDP are not episodic rewards  
 765 (c.f. Remark 3), we convert rewards into episodic rewards via using total rewards of the episode as  
 766 the reward of the last time step of the episode (rewards at other timesteps in the episode are zero) in  
 767 MARL-RUDDER methods. We use 4 random seeds for training each MARL method with RUDDER.

768 On Stag-Hunter Game, Quarry Game, Afforestation Game and SMAC scenario 2m\_vs\_1z, QMIX-  
 769 RUDDER, VDN-RUDDER, IQL-RUDDER and QTRAN-RUDDER all perform poorly as shown  
 770 in Fig. 20, 21, 22 and 23. The performances are all zero. There are three reasons caused the  
 771 poor performance: (i) RUDDER cannot capture the association between off-beat actions and off-  
 772 beat rewards, making it challenging to detect the pivot timesteps and redistribute the episodic reward  
 773 to pivot timesteps; (ii) RUDDER conducts the contribution analysis by estimating the reward of each  
 774 timestep via regression. Due to the sparsity of off-beat rewards and the estimation error of RUDDER,  
 775 RUDDER redistributes the reward to timesteps around the pivot timestep, rendering the failure of TD  
 776 learning; (iii) Our setting is a partial observable multi-agent setting, simply redistributing rewards  
 777 without considering the multi-agent setting can redistribute the reward to the wrong time steps. In TD  
 778 learning, the estimation of the TD target is essential to the learning of the policy (or the Q value).  
 779 However, with off-beat actions,  $n$ -step return and TD( $\lambda$ ) fail in Off-Beat MARL as shown in Table  
 780 2 in the main text and Sec. F.1 in Appendix. It is not surprising to see that RUDDER also fails in  
 781 Off-Beat MARL.

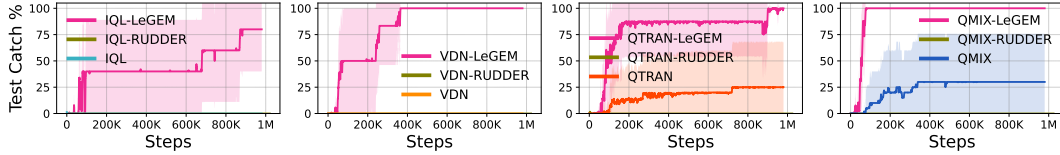

Figure 20: Results of MARL-RUDDER on Stag-Hunter Game.

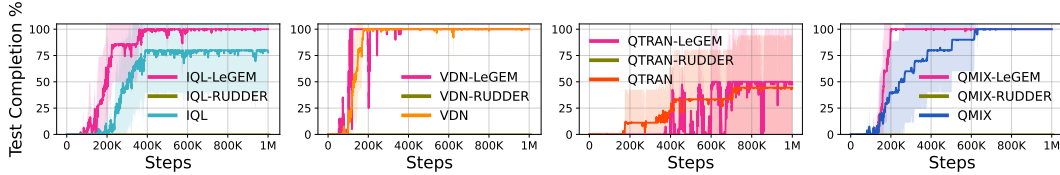

Figure 21: Results of MARL-RUDDER on Afforestation Game.

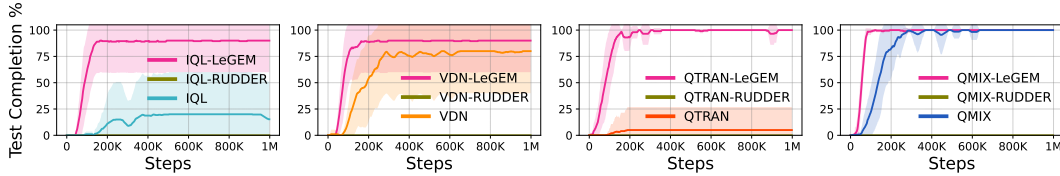

Figure 22: Results of MARL-RUDDER on Quarry Game.



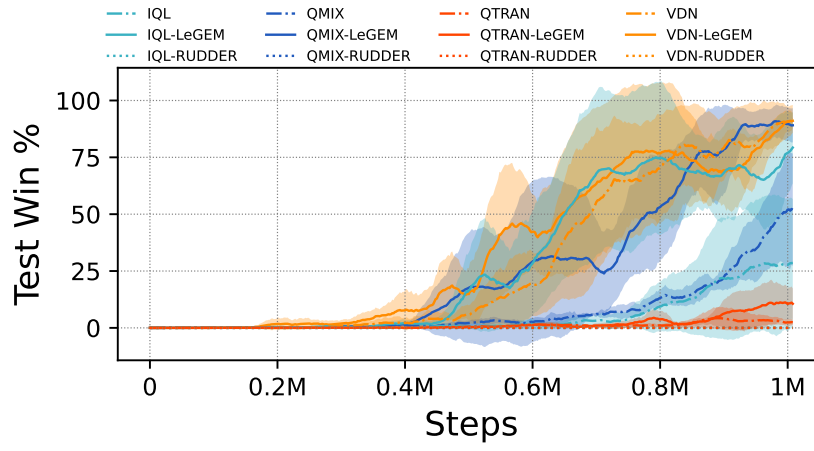

Figure 23: Results of MARL-RUDDER on 2m\_vs\_1z.
